# Supplementary material for: Quantitative trait locus mapping of Populus bark features and stem diameter
Source: BMC Plant Biol. 2017 Nov 28;17:224. doi: 10.1186/s12870-017-1166-4 (PMC5704590; doi:10.1186/s12870-017-1166-4)
Supplement: Supplementary file 7 — The 90th percentile candidate genes within the ninety four QTL detected in Populus Family 52–124. Physical localization, annotation and expression profile of gene models in the 90th percentile with high expression within LOD peaks for each QTL interval for all traits. (XLSX 78 kb) [file 12870_2017_1166_MOESM7_ESM.xlsx]

## Sheet: Bark Texture
Table S5. The 90th percentile candidate genes within the ninety four QTL detected in Populus Family 52-124. Physical localization, annotation and expression profile of gene models in the 90th percentile with high expression within LOD peaks for each QTL interval for all traits.
Linkage Group	Gene Name		Location in the genome sequence				LOD score	Population (with		Annotation											Tissue (expression FPKM)																						Total Expression		Affymetrix Microarrays expression
			Scaffold	Gene Start (bp)	Gene End (bp)		(peak)	highest LOD score)		PFAM Description	Panther Description	KOG Desctiption	EC Description	KO Description	TAIR10	TAIR10 symbol	TAIR10 short_description	TAIR10 Curator_summary	TAIR10 Computational_description		BESC423.ZL 7 female early	BESC443.ZG 43 female receptive	BESC842.ZI 22 female late	Early dormant bud.early dormant bud	Fully open bud.fully open bud	GW9592.ZK 10 male early	GW9840.ZE 30 male early	Leaf first fully expanded.standard	Leaf immature.standard	Leaf young.standard	Predormant bud I	Predormant bud II	Root tip.standard	Root.ammonia	Root.nitrate	Root.standard	Root.urea	Stem inode.standard	Stem node.standard	Stem.ammonia	Stem.nitrate	Stem.urea			Probesets	Bark and mature phloem	Developing Phloem	Cambium	Developing Xylem
1	Potri.001G206600		LG_1	20658471	20661501		9.88	mBT3yOR			FAMILY NOT NAMED				AT5G64550.1		loricrin-related		loricrin-related; BEST Arabidopsis thaliana protein match is: loricrin-related (TAIR:AT5G09670.1); Has 1807 Blast hits to 1807 proteins in 277 species: Archae - 0; Bacteria - 0; Metazoa - 736; Fungi - 347; Plants - 385; Viruses - 0; Other Eukaryotes - 339 (source: NCBI BLink).		8.3	8.785	8.417	17.706	8.955	12.663	9.935	13.493	13.825	11.846	12.497	10.927	23.803	26.652	14.021	19.72	14.821	18.28	10.646	16.918	20.323	9.758	312.291		PtpAffx.200586.1.S1_s_at	8.70808	8.64553	8.63689	8.93934
1	Potri.001G206700		LG_1	20662693	20669040		9.88	mBT3yOR		Leucine rich repeat N-terminal domain, Protein kinase domain		Serine/threonine protein kinase	Non-specific serine/threonine protein kinase.	brassinosteroid insensitive 1-associated receptor kinase 1 [EC:2.7.10.1 2.7.11.1]	AT4G33430.1	ATBAK1,ATSERK3,BAK1,ELG,RKS10,SERK3	BRI1-associated receptor kinase	Leu-rich receptor Serine/threonine protein kinase. Component of BR signaling that interacts with BRI1 in vitro and in vivo to form a heterodimer. Brassinolide-dependent association of BRI1 and BAK1 in vivo. Phosphorylation of both BRI1 and BAK1 on Thr residues was BR dependent. Although BAK1 and BRI1 alone localize in the plasma membrane, when BAK1 and BRI1 are coexpressed, the heterodimer BAK1/B…	BRI1-associated receptor kinase (BAK1); FUNCTIONS IN: protein binding, protein serine/threonine kinase activity, protein heterodimerization activity, kinase activity; INVOLVED IN: in 6 processes; LOCATED IN: endosome, plasma membrane, protein complex; EXPRESSED IN: 26 plant structures; EXPRESSED DURING: 13 growth stages; CONTAINS InterPro DOMAIN/s: Protein kinase, ATP binding site (InterPro:IPR01…		1.786	1.607	1.919	2.032	0.957	1.548	1.586	2.134	1.826	1.54	1.484	1.417	2.913	3.11	1.701	3.058	3.09	3.734	2.549	2.166	2.247	1.661	46.065		PtpAffx.33230.1.S1_at	8.17129	8.00942	8.09053	8.9002
1	Potri.001G206800		LG_1	20699464	20704399		9.88	mBT3yOR		Fibronectin type III-like domain, Glycosyl hydrolase family 3 N terminal domain	PERIPLASMIC BETA-GLUCOSIDASE-RELATED		Non-reducing end alpha-L-arabinofuranosidase, Xylan 1,4-beta-xylosidase.		AT5G64570.1	ATBXL4,XYL4	beta-D-xylosidase 4	Encodes a beta-d-xylosidase that belongs to family 3 of glycoside hydrolases.	beta-D-xylosidase 4 (XYL4); FUNCTIONS IN: xylan 1,4-beta-xylosidase activity, hydrolase activity, hydrolyzing O-glycosyl compounds; INVOLVED IN: xylan catabolic process; LOCATED IN: apoplast, cell wall; EXPRESSED IN: 24 plant structures; EXPRESSED DURING: 13 growth stages; CONTAINS InterPro DOMAIN/s: Glycoside hydrolase, family 3, N-terminal (InterPro:IPR001764), Glycoside hydrolase, family 3, C-…		18.958	11.865	10.449	1.336	13.483	16.22	18.093	11.899	0.484	7.228	6.336	5.915	1.523	1.148	6.652	2.739	6.53	40.056	7.386	4.325	3.396	5.787	201.808		PtpAffx.122394.1.S1_s_at	7.76286	9.79501	10.6085	11.0804
1	Potri.001G207000		LG_1	20738769	20742872		9.88	mBT3yOR		Putative RNA methylase family UPF0020	RNA METHYLASE-RELATED		tRNA (guanine(10)-N(2))-methyltransferase.		AT3G26410.1		methyltransferases;nucleic acid binding	Encodes a protein involved in modification of nucleosides in tRNA. Mutants have only 7.3% 2-methylguanosine levels of wild type counterparts.	methyltransferases;nucleic acid binding; FUNCTIONS IN: methyltransferase activity, nucleic acid binding; INVOLVED IN: methylation; LOCATED IN: endomembrane system; EXPRESSED IN: 22 plant structures; EXPRESSED DURING: 13 growth stages; CONTAINS InterPro DOMAIN/s: Putative RNA methylase (InterPro:IPR000241), tRNA guanosine-2&apos;-O-methyltransferase, TRM11 (InterPro:IPR016691), DNA methylase, N-6 …		6.392	7.496	5.717	23.136	3.86	2.261	3.504	1.537	26.868	4.458	13.678	7.34	21.393	22.955	9.635	17.497	13.312	7.766	9.234	6.934	10.169	6.487	231.629		PtpAffx.88.1.S1_at	10.2342	9.84219	9.59764	8.66507
1	Potri.001G207100		LG_1	20750806	20752266		9.88	mBT3yOR		Zinc knuckle, RNA recognition motif. (a.k.a. RRM, RBD, or RNP domain)	FAMILY NOT NAMED			heterogeneous nuclear ribonucleoprotein G	AT3G26420.1	ATRZ-1A	RNA-binding (RRM/RBD/RNP motifs) family protein with retrovirus zinc finger-like domain	Zinc finger-containing glycine-rich RNA-binding protein. Cold-inducible. Contributes to the enhancement of freezing tolerance. Members of this protein family include AT3G26420 (ATRZ-1A), AT1G60650 (AtRZ-1b) and AT5G04280 (AtRZ-1c).	ATRZ-1A; CONTAINS InterPro DOMAIN/s: RNA recognition motif, RNP-1 (InterPro:IPR000504), Nucleotide-binding, alpha-beta plait (InterPro:IPR012677), Zinc finger, CCHC-type (InterPro:IPR001878); BEST Arabidopsis thaliana protein match is: RNA-binding (RRM/RBD/RNP motifs) family protein with retrovirus zinc finger-like domain (TAIR:AT5G04280.1); Has 19846 Blast hits to 11644 proteins in 926 species: …		79.626	73.674	77.309	89.429	67.846	69.324	78.214	54.912	165.203	55.267	76.722	70.144	86.849	89.633	60.609	126.47	104.456	69.25	106.759	73.864	81.14	78.522	1835.22		PtpAffx.5360.1.S1_at	12.8627	12.8471	12.5485	12.465
1	Potri.001G207200		LG_1	20752281	20753117		9.88	mBT3yOR													4.693	3.819	5.163	25.635	4.605	6.126	4.476	6.154	21.797	13.811	13.907	11.784	26.02	29.874	14.267	29.425	22.446	16.531	25.405	28.656	28.571	32.741	375.906		PtpAffx.95526.1.A1_at	9.57185	10.2777	10.5277	10.8051
1	Potri.001G208200		LG_1	20868502	20873427		9.88	mBT3yOR		pinin/SDK/memA/ protein conserved region	PINN	Pinin (desmosome-associated protein)		pinin	AT1G15200.1		protein-protein interaction regulator family protein		protein-protein interaction regulator family protein; CONTAINS InterPro DOMAIN/s: Pinin/SDK/memA protein (InterPro:IPR006786); Has 5330 Blast hits to 4034 proteins in 383 species: Archae - 10; Bacteria - 289; Metazoa - 2328; Fungi - 484; Plants - 229; Viruses - 50; Other Eukaryotes - 1940 (source: NCBI BLink).		1.949	2.217	2.171	4.649	2.036	1.9	2.141	1.457	4.544	2.646	3.324	3.011	4.119	4.283	3.273	3.029	2.598	2.381	2.892	3.267	3.874	3.012	64.773		PtpAffx.139756.1.S1_at	8.84173	9.49836	9.42882	9.21372
2	Potri.002G061400		LG_2	4174731	4178931		8.16	BT6yWV		Fatty acid hydroxylase superfamily	STEROL DESATURASE	Sphingolipid hydroxylase	Sphinganine C(4)-monooxygenase.	C4-hydroxylase [EC:1.14.-.-]	AT1G14290.1	SBH2	sphingoid base hydroxylase 2	Encodes one of the two redundant sphingoid base hydroxylases (SBH). Involved in sphingolipid trihydroxy long-chain base (4-hydroxysphinganine) biosynthesis. Double mutants of SBHs were dwarfed and not able to progress from vegetative to reproductive growth.	sphingoid base hydroxylase 2 (SBH2); CONTAINS InterPro DOMAIN/s: Fatty acid hydroxylase (InterPro:IPR006694); BEST Arabidopsis thaliana protein match is: sphingoid base hydroxylase 1 (TAIR:AT1G69640.1); Has 2314 Blast hits to 2272 proteins in 379 species: Archae - 0; Bacteria - 367; Metazoa - 413; Fungi - 680; Plants - 393; Viruses - 3; Other Eukaryotes - 458 (source: NCBI BLink).		2.308	2.017	2.777	3.367	2.008	3.24	2.97	4.172	4.004	3.214	2.892	3.288	3.761	4.105	2.693	4.847	5.127	4.833	5.806	3.452	3.74	3.101	77.722		PtpAffx.284.1.A1_at	10.5885	10.4558	10.2282	10.7944
2	Potri.002G061500		LG_2	4182970	4184365		8.16	BT6yWV		CS domain	TELOMERASE-BINDING PROTEIN P23 (HSP90 CO-CHAPERONE)	HSP90 co-chaperone p23			AT4G02450.1		HSP20-like chaperones superfamily protein		HSP20-like chaperones superfamily protein; FUNCTIONS IN: molecular_function unknown; LOCATED IN: plasma membrane; EXPRESSED IN: 24 plant structures; EXPRESSED DURING: 15 growth stages; CONTAINS InterPro DOMAIN/s: CS-like domain (InterPro:IPR007052), HSP20-like chaperone (InterPro:IPR008978), CS domain (InterPro:IPR017447); BEST Arabidopsis thaliana protein match is: HSP20-like chaperones superfam…		30.48	26.191	28.202	40.563	32.776	15.316	20.773	15.32	33.229	19.625	37.781	27.945	38.337	35.711	30.473	25.911	23.668	29.068	27.851	31.199	28.071	20.063	618.553		Ptp.5836.1.S1_at	10.0896	10.7921	10.2709	9.96519
2	Potri.002G061900		LG_2	4194597	4200788		8.16	BT6yWV		DAHP synthetase I family	PHOSPHO-2-DEHYDRO-3-DEOXYHEPTONATE ALDOLASE		3-deoxy-8-phosphooctulonate synthase.	2-dehydro-3-deoxyphosphooctonate aldolase (KDO 8-P synthase) [EC:2.5.1.55]	AT1G79500.2	AtkdsA1	Aldolase-type TIM barrel family protein	Encodes a protein with 3-deoxy-8-phosphooctulonate synthase (KDOP synthase) activity which is involved in the biosynthesis of KDO, a component of cell wall rhamnogalacturonan II.	AtkdsA1; FUNCTIONS IN: 3-deoxy-8-phosphooctulonate synthase activity; INVOLVED IN: metabolic process, rhamnogalacturonan II biosynthetic process; LOCATED IN: endomembrane system, cytoplasm; EXPRESSED IN: 22 plant structures; EXPRESSED DURING: 13 growth stages; CONTAINS InterPro DOMAIN/s: DAHP synthetase I/KDSA (InterPro:IPR006218), Aldolase-type TIM barrel (InterPro:IPR013785), 3-deoxy-8-phosphoo…		0.567	0.545	0.66	0.592	0.522	0.444	0.547	0.107	0.313	0.683	1.085	0.886	0.502	0.503	0.879	0.347	0.33	0.382	0.376	0.716	0.742	0.426	12.154		PtpAffx.24689.1.S1_at	9.81662	10.0567	10.1123	10.1479
2	Potri.002G062300		LG_2	4209380	4211716		8.16	BT6yWV							AT1G71780.1				unknown protein; FUNCTIONS IN: molecular_function unknown; INVOLVED IN: biological_process unknown; LOCATED IN: endoplasmic reticulum; EXPRESSED IN: 25 plant structures; EXPRESSED DURING: 15 growth stages; Has 34 Blast hits to 34 proteins in 11 species: Archae - 0; Bacteria - 0; Metazoa - 0; Fungi - 0; Plants - 34; Viruses - 0; Other Eukaryotes - 0 (source: NCBI BLink).		2.564	1.862	2.499	2.728	1.246	3.724	3.237	4.796	1.378	1.383	2.265	1.791	2.683	2.777	1.472	2.416	2.331	2.987	3.274	2.04	2.029	1.619	53.101		PtpAffx.40412.1.S1_at	10.3999	10.0549	9.50028	10.3107
2	Potri.002G064400		LG_2	4336588	4348219		8.16	BT6yWV						GIGANTEA	AT1G22770.1	FB,GI	gigantea protein (GI)	Together with CONSTANTS (CO) and FLOWERING LOCUS T (FT), GIGANTEA promotes flowering under long days in a circadian clock-controlled flowering pathway. GI acts earlier than CO and FT in the pathway by increasing CO and FT mRNA abundance. Located in the nucleus. Regulates several developmental processes, including photoperiod-mediated flowering, phytochrome B signaling, circadian clock, carbohydra…	GIGANTEA (GI); Has 351 Blast hits to 349 proteins in 54 species: Archae - 0; Bacteria - 0; Metazoa - 0; Fungi - 0; Plants - 351; Viruses - 0; Other Eukaryotes - 0 (source: NCBI BLink).		5.882	5.606	5.928	9.367	5.156	7.781	6.821	4.371	16.857	3.548	3.437	3.983	12.884	14.801	3.41	9.551	11.271	6.823	13.386	9.385	9.845	3.996	174.089		Ptp.4849.1.S1_s_at	10.6366	10.4392	10.7307	10.5685
2	Potri.002G064800		LG_2	4358793	4363331		8.16	BT6yWV							AT4G09830.1		Uncharacterised conserved protein UCP009193		Uncharacterised conserved protein UCP009193; CONTAINS InterPro DOMAIN/s: Uncharacterised conserved protein UCP009193 (InterPro:IPR016549); BEST Arabidopsis thaliana protein match is: Uncharacterised conserved protein UCP009193 (TAIR:AT5G64780.1); Has 86 Blast hits to 86 proteins in 18 species: Archae - 0; Bacteria - 0; Metazoa - 0; Fungi - 2; Plants - 84; Viruses - 0; Other Eukaryotes - 0 (source…		7.7	6.434	7.589	4.772	5.411	17.846	14.893	22.977	3.465	6.321	5.906	5.456	4.193	3.795	5.265	7.769	8.376	10.766	9.861	8.452	7.464	6.321	181.032		PtpAffx.581.2.S1_at	10.4371	10.5017	10.2515	10.9631
2	Potri.002G064900		LG_2	4372264	4375872		8.16	BT6yWV							AT1G22790.2				unknown protein; FUNCTIONS IN: molecular_function unknown; INVOLVED IN: biological_process unknown; LOCATED IN: plasma membrane; EXPRESSED IN: 22 plant structures; EXPRESSED DURING: 13 growth stages; BEST Arabidopsis thaliana protein match is: unknown protein (TAIR:AT1G34010.1); Has 35333 Blast hits to 34131 proteins in 2444 species: Archae - 798; Bacteria - 22429; Metazoa - 974; Fungi - 991; Pla…		10.491	10.488	11.13	4.668	6.684	15.518	11.031	9.331	2.304	9.345	10.672	9.114	5.785	4.887	9.249	8.851	10.196	10.249	8.897	15.155	12.558	10.508	207.111		PtpAffx.98559.1.S1_at	8.30569	9.45951	9.4386	10.7304
6	Potri.006G204600		LG_6	22006547	22015392		6.04	mBT5yOR		Uncharacterised conserved protein	UNCHARACTERIZED	Uncharacterized conserved protein			AT3G28430.1				unknown protein; FUNCTIONS IN: molecular_function unknown; INVOLVED IN: biological_process unknown; LOCATED IN: mitochondrion; EXPRESSED IN: 17 plant structures; EXPRESSED DURING: 6 growth stages; CONTAINS InterPro DOMAIN/s: Protein of unknown function FPL (InterPro:IPR019155); Has 243 Blast hits to 233 proteins in 101 species: Archae - 0; Bacteria - 0; Metazoa - 110; Fungi - 0; Plants - 53; Viru…		1.336	0.91	1.099	2.313	1.902	1.113	1.304	0.658	1.812	1.873	1.865	1.767	2.683	2.916	2.533	0.953	0.871	1.239	0.595	1.713	1.981	1.255	34.691		Ptp.4103.1.S1_at	8.29515	8.67614	9.27803	9.76884
6	Potri.006G204900		LG_6	22072462	22075899		6.04	mBT5yOR		C-terminal domain of 1-Cys peroxiredoxin	THIOREDOXIN PEROXIDASE	Alkyl hydroperoxide reductase, thiol specific antioxidant and related enzymes	Peroxiredoxin.	peroxiredoxin (alkyl hydroperoxide reductase subunit C) [EC:1.11.1.15]	AT5G06290.1	2-Cys Prx B,2CPB	2-cysteine peroxiredoxin B	Encodes a 2-Cys peroxiredoxin (2-Cys PrxB) that contains two catalytic Cys residues.	2-cysteine peroxiredoxin B (2-Cys Prx B); FUNCTIONS IN: peroxiredoxin activity, antioxidant activity; INVOLVED IN: response to cold, defense response to bacterium; LOCATED IN: apoplast, stromule, chloroplast stroma, chloroplast; EXPRESSED IN: 23 plant structures; EXPRESSED DURING: 13 growth stages; CONTAINS InterPro DOMAIN/s: Peroxiredoxin, C-terminal (InterPro:IPR019479), Thioredoxin fold (Inter…		13.959	11.643	10.994	6.865	22.399	5.88	6.788	2.658	10.172	9.253	11.123	12.397	4.952	4.609	9.886	2.964	3.093	3.15	3.042	5.687	5.342	10.666	177.522		PtpAffx.3462.1.A1_a_at	9.98802	9.59548	9.26253	9.33102
6	Potri.006G205700		LG_6	22136581	22140321		6.04	mBT5yOR		Ubiquitin-conjugating enzyme	UBIQUITIN-CONJUGATING ENZYME E2	Ubiquitin-conjugating enzyme E2	Ubiquitin--protein ligase.	ubiquitin-conjugating enzyme E2 variant	AT2G36060.1	MMZ3,UEV1C	MMS ZWEI homologue 3	MMZ3/UEV1C encodes a protein that may play a role in DNA damage responses and error-free post-replicative DNA repair by participating in lysine-63-based polyubiquitination reactions. UEV1C can form diubiquitin and triubiquitin chains in combination with UBC13A/UBC35 in vitro. It can also functionally complement an mms2 mutation in budding yeast, both by increasing mms2 mutant viability in the pre…	MMS ZWEI homologue 3 (MMZ3); CONTAINS InterPro DOMAIN/s: Ubiquitin-conjugating enzyme/RWD-like (InterPro:IPR016135), Ubiquitin-conjugating enzyme, E2 (InterPro:IPR000608); BEST Arabidopsis thaliana protein match is: ubiquitin E2 variant 1D-4 (TAIR:AT3G52560.1); Has 2912 Blast hits to 2912 proteins in 287 species: Archae - 0; Bacteria - 0; Metazoa - 1566; Fungi - 354; Plants - 579; Viruses - 0; Ot…		5.104	5.457	5.849	7.984	4.51	8.021	7.399	7.124	6.205	8.313	8.159	7.683	7.074	7.155	6.205	11.661	11.532	10.533	14.582	11.57	11.673	8.06	181.853		PtpAffx.24155.1.A1_s_at	13.3293	13.165	12.7178	12.9948
6	Potri.006G207800		LG_6	22304609	22308462		6.04	mBT5yOR			FAMILY NOT NAMED				AT3G11590.1				unknown protein; LOCATED IN: plasma membrane; EXPRESSED IN: 22 plant structures; EXPRESSED DURING: 13 growth stages; BEST Arabidopsis thaliana protein match is: unknown protein (TAIR:AT5G22310.1); Has 22320 Blast hits to 15179 proteins in 1213 species: Archae - 372; Bacteria - 2307; Metazoa - 10906; Fungi - 1700; Plants - 1146; Viruses - 65; Other Eukaryotes - 5824 (source: NCBI BLink).		2.323	2.61	3.27	3.508	1.992	1.568	2.229	0.738	2.785	2.307	3.237	2.575	4.283	4.349	3.79	2.843	3.123	2.27	1.912	2.842	3.566	1.753	59.873		PtpAffx.102425.1.A1_at	9.21681	9.13649	9.34544	9.08286
6	Potri.006G208600		LG_6	22385216	22388625		6.04	mBT5yOR		Dcp1-like decapping family	TRANSCRIPTION FACTOR SMIF (DECAPPING ENZYME DCP1)	Decapping enzyme complex component DCP1			AT1G08370.1	ATDCP1,DCP1	decapping 1	Encodes DCP1 involved in mRNA decapping. DCP1 forms a mRNA decapping complex with DCP2 (At5g13570) and VCS (VARICOSE) (At3g13300). However, unlike DCP2, DCP1 itself does not have mRNA decapping activity in vitro. DCP1, DCP2 and VCS colocalize in cytoplasmic loci, which are putative Arabidopsis mRNA processing bodies. mutants of DCP1, DCP2, and VCS accumulate capped mRNAs with a reduced degradatio…	decapping 1 (DCP1); CONTAINS InterPro DOMAIN/s: Dcp1-like decapping (InterPro:IPR010334); Has 3561 Blast hits to 2917 proteins in 377 species: Archae - 4; Bacteria - 239; Metazoa - 1310; Fungi - 561; Plants - 741; Viruses - 142; Other Eukaryotes - 564 (source: NCBI BLink).		2.797	3.244	3.929	2.695	1.351	3.459	3.515	2.761	3.546	1.857	1.782	1.718	2.847	3.026	1.742	3.903	3.918	2.443	3.913	2.783	3.079	2.083	62.391		PtpAffx.115188.1.A1_at	10.98	10.9536	10.8843	10.7322
6	Potri.006G209100		LG_6	22429546	22434199		6.04	mBT5yOR		Vacuolar protein sorting 55	LEPTIN RECEPTOR-RELATED	Leptin receptor gene-related protein			AT3G11530.2		Vacuolar protein sorting 55 (VPS55) family protein		Vacuolar protein sorting 55 (VPS55) family protein; FUNCTIONS IN: transporter activity; INVOLVED IN: transport; LOCATED IN: vacuole; EXPRESSED IN: 24 plant structures; EXPRESSED DURING: 15 growth stages; CONTAINS InterPro DOMAIN/s: Vacuolar protein sorting 55 (InterPro:IPR007262); BEST Arabidopsis thaliana protein match is: Vacuolar protein sorting 55 (VPS55) family protein (TAIR:AT1G32410.5); Ha…		1.323	1.446	1.645	2.199	0.937	2.226	1.848	1.806	2.649	2.642	2.677	2.496	2.226	2.22	1.859	2.931	3.149	2.515	3.65	3.691	3.872	2.217	52.224		PtpAffx.153619.1.A1_at	9.88894	9.10392	8.06582	8.88636
6	Potri.006G209700		LG_6	22462842	22465683		6.04	mBT5yOR		Ribosomal protein S4/S9 N-terminal domain	30S 40S RIBOSOMAL PROTEIN	Ribosomal protein S4		small subunit ribosomal protein S9e	AT5G39850.1		Ribosomal protein S4		Ribosomal protein S4; FUNCTIONS IN: structural constituent of ribosome; INVOLVED IN: translation; LOCATED IN: cytosolic small ribosomal subunit, membrane; EXPRESSED IN: 22 plant structures; EXPRESSED DURING: 13 growth stages; CONTAINS InterPro DOMAIN/s: Ribosomal protein S4 (InterPro:IPR001912), Ribosomal protein S4, conserved site (InterPro:IPR018079), Ribosomal protein S4/S9, eukaryotic/archaea…		22.654	16.981	34.448	31.918	29.93	21.043	3.663	9.223	28.029	19.104	36.561	28.688	25.652	27.464	22.866	28.211	28.564	28.071	38.463	25.815	24.417	23.708	555.473		PtpAffx.249.44.S1_x_at	13.0038	12.9783	12.7828	12.691
6	Potri.006G210500		LG_6	22494636	22498469		6.04	mBT5yOR			FAMILY NOT NAMED				AT5G06130.1		chaperone protein dnaJ-related		chaperone protein dnaJ-related; BEST Arabidopsis thaliana protein match is: unknown protein (TAIR:AT5G61670.2); Has 35333 Blast hits to 34131 proteins in 2444 species: Archae - 798; Bacteria - 22429; Metazoa - 974; Fungi - 991; Plants - 531; Viruses - 0; Other Eukaryotes - 9610 (source: NCBI BLink).		7.081	6.721	6.982	8.026	12.844	4.502	5.247	4.666	6.333	10.237	7.508	9.632	5.118	5.632	8.488	4.988	5.041	9.926	4.624	11.51	9.405	9.833	164.344		PtpAffx.158450.1.S1_at	10.8228	10.5353	9.9976	10.4976
6	Potri.006G211100		LG_6	22546185	22548377		6.04	mBT5yOR		LSM domain	SMALL NUCLEAR RIBONUCLEOPROTEIN	Small Nuclear ribonucleoprotein G		small nuclear ribonucleoprotein G	AT3G11500.1		Small nuclear ribonucleoprotein family protein		Small nuclear ribonucleoprotein family protein; FUNCTIONS IN: molecular_function unknown; LOCATED IN: nucleolus, nucleus, small nucleolar ribonucleoprotein complex; EXPRESSED IN: 22 plant structures; EXPRESSED DURING: 13 growth stages; CONTAINS InterPro DOMAIN/s: Like-Sm ribonucleoprotein (LSM) domain (InterPro:IPR001163), Like-Sm ribonucleoprotein (LSM) domain, eukaryotic/archaea-type (InterPro:…		8.622	8.629	8.14	12.032	8.209	4.898	7.72	2.76	20.234	4.325	10.081	7.044	8.468	8.033	6.157	5.887	4.891	4.673	8.372	7.324	7.629	5.578	169.706		PtpAffx.14782.1.A1_s_at	10.2294	9.44532	8.88866	8.84665
6	Potri.006G211900		LG_6	22598751	22600623		6.04	mBT5yOR		Replication factor A protein 3	FAMILY NOT NAMED			replication factor A3	AT3G52630.1		Nucleic acid-binding, OB-fold-like protein		Nucleic acid-binding, OB-fold-like protein; CONTAINS InterPro DOMAIN/s: Nucleic acid-binding, OB-fold-like (InterPro:IPR016027), Replication factor A protein 3 (InterPro:IPR013970); BEST Arabidopsis thaliana protein match is: Nucleic acid-binding, OB-fold-like protein (TAIR:AT4G18590.1); Has 94 Blast hits to 94 proteins in 37 species: Archae - 0; Bacteria - 0; Metazoa - 29; Fungi - 0; Plants - 56…		5.04	3.889	3.689	5.667	7.951	1.33	2.589	1.1	3.131	3.498	9.731	6.7	5.392	4.332	5.756	4.469	3.817	3.851	5.35	4.674	5.877	3.047	100.88		PtpAffx.17813.1.S1_at	9.36624	10.0899	9.47336	9.26929
8	Potri.008G085600		LG_8	5371258	5372841		6.72	1BT3yOR		Protein of unknown function (DUF793)	FAMILY NOT NAMED				AT1G18740.1		Protein of unknown function (DUF793)		FUNCTIONS IN: molecular_function unknown; INVOLVED IN: biological_process unknown; EXPRESSED IN: 23 plant structures; EXPRESSED DURING: 13 growth stages; CONTAINS InterPro DOMAIN/s: Protein BYPASS related (InterPro:IPR008511); BEST Arabidopsis thaliana protein match is: Protein of unknown function (DUF793) (TAIR:AT1G74450.1); Has 167 Blast hits to 164 proteins in 20 species: Archae - 3; Bacteria …		8.066	6.973	9.148	13.861	6.835	18.99	13.568	10.5	15.921	7.302	6.638	5.866	20.676	17.476	5.417	26.856	36.523	16.278	56.411	15.025	15	13.821	347.151		PtpAffx.64674.1.S1_s_at	10.8531	10.2559	9.19397	9.51488
8	Potri.008G086400		LG_8	5424375	5427734		6.72	1BT3yOR		GDA1/CD39 (nucleoside phosphatase) family	ADENOSINE/GUANOSINE DIPHOSPHATASE	Nucleoside phosphatase	Apyrase.		AT2G02970.1		GDA1/CD39 nucleoside phosphatase family protein	Encodes a putative apyrase involved in pollen exine pattern formation and anther dehiscence.	GDA1/CD39 nucleoside phosphatase family protein; FUNCTIONS IN: hydrolase activity; INVOLVED IN: biological_process unknown; EXPRESSED IN: 24 plant structures; EXPRESSED DURING: 15 growth stages; CONTAINS InterPro DOMAIN/s: Nucleoside phosphatase GDA1/CD39 (InterPro:IPR000407); BEST Arabidopsis thaliana protein match is: GDA1/CD39 nucleoside phosphatase family protein (TAIR:AT1G14230.1); Has 1462 …		3.087	2.86	3.652	3.683	2.252	5.248	4.826	6.42	3.068	3.27	3.106	3.1	4.658	4.798	3.65	5.55	5.749	4.48	4.517	4.557	4.491	3.031	90.053		PtpAffx.8013.1.A1_at	10.1318	10.4903	10.7473	10.9945
8	Potri.008G087200		LG_8	5462610	5463652		6.72	1BT3yOR		Ring finger domain	RING ZINC FINGER PROTEIN		Ubiquitin--protein ligase.		AT1G26800.1		RING/U-box superfamily protein		RING/U-box superfamily protein; FUNCTIONS IN: zinc ion binding; EXPRESSED IN: 20 plant structures; EXPRESSED DURING: 11 growth stages; CONTAINS InterPro DOMAIN/s: Zinc finger, RING-type (InterPro:IPR001841), Zinc finger, C3HC4 RING-type (InterPro:IPR018957); BEST Arabidopsis thaliana protein match is: RING/U-box superfamily protein (TAIR:AT1G14200.1); Has 9899 Blast hits to 9869 proteins in 270 s…		8.701	4.779	8.785	31.831	8.525	8.868	6.993	15.739	43.795	7.711	10.095	9.339	66.095	100.938	5.188	23.592	26.328	8.816	16.345	12.438	15.095	16.653	456.649		PtpAffx.11664.2.S1_at	10.4613	9.89788	9.0362	9.93683
12	Potri.012G108200		LG_12	13144073	13150823		3.77	1BT5yOR		C2 domain	COPINE	Copine			AT5G07300.1	BON2	Calcium-dependent phospholipid-binding Copine family protein	Encodes a copine-like protein, which is a member of a newly identified class of calcium-dependent, phospholipid binding proteins that are present in a wide range of organisms.	BONZAI 2 (BON2); FUNCTIONS IN: calcium-dependent phospholipid binding; LOCATED IN: plasma membrane; EXPRESSED IN: 24 plant structures; EXPRESSED DURING: 13 growth stages; CONTAINS InterPro DOMAIN/s: C2 membrane targeting protein (InterPro:IPR018029), C2 calcium/lipid-binding domain, CaLB (InterPro:IPR008973), Copine (InterPro:IPR010734), C2 calcium-dependent membrane targeting (InterPro:IPR000008…		0.96	1.152	1.447	1.857	1.107	1.072	1.117	1.109	2.879	1.612	2.05	1.602	3.272	3.633	1.98	2.96	3.319	2.678	2.361	3.083	3.11	1.893	46.253		PtpAffx.24891.1.S1_at	9.9319	10.4814	10.9766	10.5952
12	Potri.012G109400		LG_12	13211497	13213710		3.77	1BT5yOR		AAA domain	POS9-ACTIVATING FACTOR FAP7-RELATED	Predicted nucleotide kinase/nuclear protein involved oxidative stress response	Adenylate kinase.		AT5G60340.1		P-loop containing nucleoside triphosphate hydrolases superfamily protein	Encodes a nuclear adenylate kinase that interacts with a putative homolog of Rps14, AtRPS14-1 and affects the elongation of cells in the stem.	P-loop containing nucleoside triphosphate hydrolases superfamily protein; FUNCTIONS IN: oxidoreductase activity, ATP binding; INVOLVED IN: metabolic process; LOCATED IN: mitochondrion; EXPRESSED IN: 7 plant structures; EXPRESSED DURING: LP.04 four leaves visible, C globular stage, petal differentiation and expansion stage, D bilateral stage; CONTAINS InterPro DOMAIN/s: ATPase, AAA-type, core (Int…		6.853	6.13	6.991	12.551	8.87	2.295	4.938	2.088	5.36	6.685	9.166	8.422	10.419	9.8	6.609	9.452	9.43	5.732	10.208	7.056	7.94	7.963	164.958		Ptp.4080.1.A1_s_at	10.4915	10.0678	9.17343	9.48046
12	Potri.012G109200		LG_12	13200704	13204887		3.77	1BT5yOR		Exostosin family	EXOSTOSIN (HEPARAN SULFATE GLYCOSYLTRANSFERASE)-RELATED	Acetylglucosaminyltransferase EXT1/exostosin 1	Xylogalacturonan beta-1,3-xylosyltransferase.		AT5G61840.1	GUT1	Exostosin family protein		GUT1; CONTAINS InterPro DOMAIN/s: Exostosin-like (InterPro:IPR004263); BEST Arabidopsis thaliana protein match is: Exostosin family protein (TAIR:AT1G27440.1); Has 30201 Blast hits to 17322 proteins in 780 species: Archae - 12; Bacteria - 1396; Metazoa - 17338; Fungi - 3422; Plants - 5037; Viruses - 0; Other Eukaryotes - 2996 (source: NCBI BLink).		4.745	4.823	4.274	5.163	2.346	7.181	6.46	7.768	3.836	5.059	3.813	4.082	5.376	5.458	3.994	7.368	8.334	12.375	11.806	8.411	6.614	4.7	133.986		PtpAffx.103875.1.S1_at	8.81346	9.9084	10.177	11.1417
13	Potri.013G151300		LG_13	15545458	15546340		6.4	BT4yWV		Fasciclin domain	FAMILY NOT NAMED				AT5G60490.1	FLA12	FASCICLIN-like arabinogalactan-protein 12	Encodes a member of fasciclin-like arabinogalactan proteins (FLAs) containing a cell adhesion fasciclin (FAS) domain. Mutations result in altered stem biomechanics with reduced tensile strength and reduced tensile modulus of elasticity, as well as altered cell wall architecture and composition, with increased cellulose microfibril angle, reduced arabinose, galactose and cellulose content.	FASCICLIN-like arabinogalactan-protein 12 (FLA12); LOCATED IN: plasma membrane, anchored to membrane; EXPRESSED IN: 22 plant structures; EXPRESSED DURING: 13 growth stages; CONTAINS InterPro DOMAIN/s: FAS1 domain (InterPro:IPR000782); BEST Arabidopsis thaliana protein match is: FASCICLIN-like arabinogalactan-protein 11 (TAIR:AT5G03170.1); Has 1807 Blast hits to 1807 proteins in 277 species: Archa…		0	0	0	0	0	0	0.377	0	0	0	0	0	0	0	0.014	0	0.012	0	0	19.222	5.575	5.953	31.153		Ptp.371.1.S1_x_at	7.90444	6.99358	6.93167	11.9936
13	Potri.013G151400		LG_13	15548756	15553715		6.4	BT4yWV		Fasciclin domain	FAMILY NOT NAMED				AT5G03170.1	ATFLA11,FLA11	FASCICLIN-like arabinogalactan-protein 11	Encodes FLA11, a member of fasciclin-like arabinogalactan proteins (FLAs) containing a cell adhesion fasciclin (FAS) domain. Mutations result in altered stem biomechanics with reduced tensile strength and reduced tensile modulus of elasticity, as well as altered cell wall architecture and composition, with increased cellulose microfibril angle, reduced arabinose, galactose and cellulose content.	FASCICLIN-like arabinogalactan-protein 11 (FLA11); CONTAINS InterPro DOMAIN/s: FAS1 domain (InterPro:IPR000782); BEST Arabidopsis thaliana protein match is: FASCICLIN-like arabinogalactan-protein 12 (TAIR:AT5G60490.1); Has 965 Blast hits to 948 proteins in 162 species: Archae - 18; Bacteria - 233; Metazoa - 22; Fungi - 18; Plants - 634; Viruses - 0; Other Eukaryotes - 40 (source: NCBI BLink).		0	0	0	0	0	0.305	0.218	0.01	0	0	0	0	0.003	0	0	0.009	0.006	0.008	0.008	5.306	1.564	1.501	8.938		PtpAffx.211342.1.S1_x_at	7.35173	6.75093	6.6347	11.3538
13	Potri.013G151500		LG_13	15559778	15560942		6.4	BT4yWV		Fasciclin domain	FAMILY NOT NAMED				AT5G60490.1	FLA12	FASCICLIN-like arabinogalactan-protein 12	Encodes a member of fasciclin-like arabinogalactan proteins (FLAs) containing a cell adhesion fasciclin (FAS) domain. Mutations result in altered stem biomechanics with reduced tensile strength and reduced tensile modulus of elasticity, as well as altered cell wall architecture and composition, with increased cellulose microfibril angle, reduced arabinose, galactose and cellulose content.	FASCICLIN-like arabinogalactan-protein 12 (FLA12); LOCATED IN: plasma membrane, anchored to membrane; EXPRESSED IN: 22 plant structures; EXPRESSED DURING: 13 growth stages; CONTAINS InterPro DOMAIN/s: FAS1 domain (InterPro:IPR000782); BEST Arabidopsis thaliana protein match is: FASCICLIN-like arabinogalactan-protein 11 (TAIR:AT5G03170.1); Has 1807 Blast hits to 1807 proteins in 277 species: Archa…		0.029	0	0.016	0	0	0.113	0.284	0.014	0.081	0	0.017	0	0	0.023	0	0	0	0.009	0	41.636	13.044	12.168	67.434		PtpAffx.141260.1.S1_x_at	10.5194	10.3269	10.5883	12.9813
13	Potri.013G151600		LG_13	15562512	15567739		6.4	BT4yWV		Holliday junction DNA helicase ruvB N-terminus	AAA-FAMILY ATPASE			ribosome biogenesis ATPase	AT3G01610.1	CDC48C,emb1354	cell division cycle 48C	AAA-type ATPase - Over 90% homologous to CDC48a	cell division cycle 48C (CDC48C); FUNCTIONS IN: nucleoside-triphosphatase activity, ATPase activity, nucleotide binding, ATP binding; INVOLVED IN: embryo development ending in seed dormancy; EXPRESSED IN: 21 plant structures; EXPRESSED DURING: 11 growth stages; CONTAINS InterPro DOMAIN/s: ATPase, AAA-type, core (InterPro:IPR003959), ATPase, AAA+ type, core (InterPro:IPR003593), ATPase, AAA-type, …		3.853	3.184	3.64	4.921	2.227	2.583	3.862	2.167	12.019	2.132	2.973	2.348	5.064	5.424	3.412	4.872	4.713	3.203	2.973	3.116	3.072	3.216	84.974		PtpAffx.211343.1.S1_at	8.26961	8.4885	8.58262	8.32816
13	Potri.013G151700		LG_13	15568124	15571084		6.4	BT4yWV		F-box domain	FAMILY NOT NAMED				AT3G49030.2		FBD, F-box and Leucine Rich Repeat domains containing protein		FBD, F-box and Leucine Rich Repeat domains containing protein; FUNCTIONS IN: molecular_function unknown; INVOLVED IN: biological_process unknown; LOCATED IN: cellular_component unknown; CONTAINS InterPro DOMAIN/s: FBD (InterPro:IPR013596), F-box domain, cyclin-like (InterPro:IPR001810), F-box domain, Skp2-like (InterPro:IPR022364), FBD-like (InterPro:IPR006566), Leucine-rich repeat 2 (InterPro:IP…		5.953	5.471	6.671	7.479	4.763	6.971	7.005	4.777	9.218	5.122	4.117	4.774	7.454	7.949	5.868	6.351	5.672	7.362	4.682	7.018	7.073	5.509	137.259		PtpAffx.69129.1.A1_at	8.50547	9.19914	9.51273	9.20835
13	Potri.013G152400		LG_13	15599344	15602093		6.4	BT4yWV		Xyloglucan endo-transglycosylase (XET) C-terminus	FAMILY NOT NAMED		Xyloglucan:xyloglucosyl transferase.	xyloglucan:xyloglucosyl transferase [EC:2.4.1.207]	AT4G03210.2	XTH9	xyloglucan endotransglucosylase/hydrolase 9	encodes a member of xyloglucan endotransglucosylase/hydrolases (XTHs) that catalyze the cleavage and molecular grafting of xyloglucan chains function in loosening and rearrangement of the cell wall. Gene is expressed in shoot apex region, flower buds, flower stalks and internodes bearing flowers.	xyloglucan endotransglucosylase/hydrolase 9 (XTH9); FUNCTIONS IN: hydrolase activity, acting on glycosyl bonds, xyloglucan:xyloglucosyl transferase activity; INVOLVED IN: carbohydrate metabolic process, cellular glucan metabolic process; LOCATED IN: apoplast, cell wall; EXPRESSED IN: 27 plant structures; EXPRESSED DURING: 13 growth stages; CONTAINS InterPro DOMAIN/s: Xyloglucan endotransglucosyla…		41.825	44.696	51.546	81.12	15.282	4.876	10.284	7.806	16.995	15.483	42.36	29.389	138.116	207.632	28.674	98.811	90.19	36.262	21.109	56.863	59.835	24.107	1123.26		PtpAffx.1041.1.S1_s_at	13.374	13.7185	13.5962	13.1772
13	Potri.013G152700		LG_13	15615904	15618515		6.4	BT4yWV		Multicopper oxidase	MULTI-COPPER OXIDASE		Laccase.	adenylyl-sulfate reductase (glutathione) [EC:1.8.4.9]	AT2G30210.1	LAC3	laccase 3	putative laccase, a member of laccase family of genes (17 members in Arabidopsis).	laccase 3 (LAC3); FUNCTIONS IN: laccase activity; INVOLVED IN: oxidation reduction, lignin catabolic process; LOCATED IN: endomembrane system, apoplast; EXPRESSED IN: hypocotyl, fruit, root, seed; EXPRESSED DURING: E expanded cotyledon stage; CONTAINS InterPro DOMAIN/s: Multicopper oxidase, type 3 (InterPro:IPR011707), Laccase (InterPro:IPR017761), Multicopper oxidase, type 2 (InterPro:IPR011706)…		0.182	0.457	0.269	2.398	0.032	4.804	4.532	0.149	0.143	0.019	0.006	0.007	0.717	0.559	0.013	10.836	12.812	16.335	5.576	0.129	0.205	0.175	60.355		PtpAffx.830.1.A1_at	11.2188	5.66912	4.23518	5.21858
18	Potri.018G027100		LG_18	2161521	2164203		4.45	mBT5yOR					Histone acetyltransferase.		AT4G32295.1				unknown protein; BEST Arabidopsis thaliana protein match is: unknown protein (TAIR:AT3G24150.1); Has 39 Blast hits to 39 proteins in 10 species: Archae - 0; Bacteria - 0; Metazoa - 0; Fungi - 0; Plants - 39; Viruses - 0; Other Eukaryotes - 0 (source: NCBI BLink).		0.749	1.471	0.94	27.214	2.589	0.332	0.514	1.404	3.242	2.907	9.278	3.596	38.049	37.644	6.872	1.091	1.507	1.911	1.635	2.936	6.67	1.22	153.771		PtpAffx.60070.1.S1_at	7.39663	7.88918	7.9581	10.1292
18	Potri.018G027600		LG_18	2198463	2199761		4.45	mBT5yOR		Photosystem I psaG / psaK				photosystem I subunit X	AT1G30380.1	PSAK	photosystem I subunit K	Encodes subunit K of photosystem I reaction center.	photosystem I subunit K (PSAK); FUNCTIONS IN: molecular_function unknown; INVOLVED IN: photosynthesis; LOCATED IN: thylakoid, chloroplast thylakoid membrane, photosystem I, chloroplast, membrane; EXPRESSED IN: 23 plant structures; EXPRESSED DURING: 13 growth stages; CONTAINS InterPro DOMAIN/s: Photosystem I PsaG/PsaK protein (InterPro:IPR000549), Photosystem I reaction centre, PsaK, plant (InterP…		19.392	18.742	15.867	14.051	117.639	6.891	7.315	4.284	0.9	110.498	39.842	75.447	5.069	5.446	34.511	0.256	0.221	0.279	1.226	13.131	9.222	118.141	618.37		Ptp.5906.1.S1_at	10.6391	6.93386	5.59426	7.02315
18	Potri.018G030700		LG_18	2404181	2407193		3.49	2BT5yB		Miro-like protein	FAMILY NOT NAMED		Small monomeric GTPase.		AT5G20020.1	RAN2	RAS-related GTP-binding nuclear protein 2	A member of RAN GTPase gene family. Encodes a small soluble GTP-binding protein. Likely to be involved in nuclear translocation of proteins. May also be involved in cell cycle progression.	RAS-related GTP-binding nuclear protein 2 (RAN2); FUNCTIONS IN: protein binding, GTP binding, GTPase activity; INVOLVED IN: response to cadmium ion, protein import into nucleus; LOCATED IN: nucleolus, nucleus, cytoplasm; EXPRESSED IN: cotyledon, guard cell, cultured cell; EXPRESSED DURING: seedling growth; CONTAINS InterPro DOMAIN/s: Ran GTPase (InterPro:IPR002041), Small GTP-binding protein (Int…		14.574	16.103	17.28	23.82	12.286	10.719	12.935	12.088	12.969	16.347	27.539	19.083	19.939	19.057	18.002	31.711	34.861	27.353	35.911	32.654	31.421	22.247	468.899		Ptp.5444.1.S1_x_at	13.7257	13.813	13.6611	13.5944
18	Potri.018G031400		LG_18	2435410	2439134		3.49	2BT5yB		Ubiquinol-cytochrome C reductase complex 14kD subunit	UBIQUINOL-CYTOCHROME C REDUCTASE COMPLEX 14 KD PROTEIN	Ubiquinol cytochrome c reductase, subunit QCR7		ubiquinol-cytochrome c reductase subunit 7 [EC:1.10.2.2]	AT5G25450.1		Cytochrome bd ubiquinol oxidase, 14kDa subunit		Cytochrome bd ubiquinol oxidase, 14kDa subunit; FUNCTIONS IN: ubiquinol-cytochrome-c reductase activity; INVOLVED IN: mitochondrial electron transport, ubiquinol to cytochrome c; LOCATED IN: mitochondrion, mitochondrial respiratory chain complex III, membrane; EXPRESSED IN: 21 plant structures; EXPRESSED DURING: 13 growth stages; CONTAINS InterPro DOMAIN/s: Cytochrome d ubiquinol oxidase, 14kDa s…		9.316	9.006	8.468	6.457	7.806	13.811	11.139	11.996	3.484	10.318	9.359	9.801	4.266	4.293	6.815	6.855	7.59	10.248	12.564	12.533	10.73	10.522	197.377		PtpAffx.5384.1.S1_at	12.0761	11.6605	10.9608	11.7744
[truncated: 2 more columns]

## Sheet: Diameter
Table S5. The 90th percentile candidate genes within the ninety four QTL detected in Populus Family 52-124. Physical localization, annotation and expression profile of gene models in the 90th percentile with high expression within LOD peaks for each QTL interval for all traits.
Linkage Group	Gene Name		Location in the genome sequence				LOD score	Population (with		Annotation											Tissue (expression FPKM)																						Total Expression		Affymetrix Microarrays expression
			Scaffold	Gene Start (bp)	Gene End (bp)		(peak)	highest LOD score)		PFAM Description	Panther Description	KOG Desctiption	EC Description	KO Description	TAIR10	TAIR10 symbol	TAIR10 short_description	TAIR10 Curator_summary	TAIR10 Computational_description		BESC423.ZL 7 female early	BESC443.ZG 43 female receptive	BESC842.ZI 22 female late	Early dormant bud.early dormant bud	Fully open bud.fully open bud	GW9592.ZK 10 male early	GW9840.ZE 30 male early	Leaf first fully expanded.standard	Leaf immature.standard	Leaf young.standard	Predormant bud I	Predormant bud II	Root tip.standard	Root.ammonia	Root.nitrate	Root.standard	Root.urea	Stem inode.standard	Stem node.standard	Stem.ammonia	Stem.nitrate	Stem.urea			Probesets	Bark and mature phloem	Developing Phloem	Cambium	Developing Xylem
6	Potri.006G227700		LG_6	23901118	23906774		3.77	mD3yOR		AAA domain (dynein-related subfamily)	METALLOPROTEASE M41 FTSH			ATP-dependent metalloprotease [EC:3.4.24.-]	AT2G26140.1	ftsh4	FTSH protease 4	encodes an FtsH protease that is localized to the mitochondrion	FTSH protease 4 (ftsh4); FUNCTIONS IN: metallopeptidase activity, ATP-dependent peptidase activity, ATPase activity; INVOLVED IN: proteolysis, protein catabolic process; LOCATED IN: mitochondrion, plastid, membrane; EXPRESSED IN: 26 plant structures; EXPRESSED DURING: 15 growth stages; CONTAINS InterPro DOMAIN/s: Peptidase M41, FtsH (InterPro:IPR005936), ATPase, AAA+ type, core (InterPro:IPR00359…		3.32	3.077	2.999	3.709	2.912	3.459	3.084	4.299	4.479	2.905	2.75	2.989	4.578	4.507	3.698	4.022	3.855	4.179	3.279	4.064	3.801	3.276	79.241		PtpAffx.206674.1.S1_s_at	10.2093	10.2746	10.3947	10.4809
6	Potri.006G228000		LG_6	23914903	23918395		3.77	mD3yOR		NAD dependent epimerase/dehydratase family	NAD DEPENDENT EPIMERASE/DEHYDRATASE	UDP-glucose 4-epimerase/UDP-sulfoquinovose synthase	UDP-sulfoquinovose synthase.	UDP-sulfoquinovose synthase [EC:3.13.1.1]	AT4G33030.1	SQD1	sulfoquinovosyldiacylglycerol 1	involved in sulfolipid biosynthesis	sulfoquinovosyldiacylglycerol 1 (SQD1); FUNCTIONS IN: UDPsulfoquinovose synthase activity, sulfotransferase activity, zinc ion binding; INVOLVED IN: cellular response to phosphate starvation, sulfolipid biosynthetic process, glycolipid biosynthetic process; LOCATED IN: chloroplast; EXPRESSED IN: 24 plant structures; EXPRESSED DURING: 14 growth stages; CONTAINS InterPro DOMAIN/s: NAD-dependent epi…		17.027	12.036	11.617	10.684	23.656	5.233	9.216	3.282	9.741	15.283	14.865	18.996	11.408	12.241	17.502	5.305	6.622	4.934	4.071	8.366	7.606	13.7	243.391		PtpAffx.3783.1.S1_at	11.4683	10.4399	10.1302	9.74237
6	Potri.006G228800		LG_6	23967363	23969035		4.06	mD3yOR		Domain of unknown function (DUF4408)					AT2G26110.1		Protein of unknown function (DUF761)		Protein of unknown function (DUF761); CONTAINS InterPro DOMAIN/s: Protein of unknown function DUF761, plant (InterPro:IPR008480); BEST Arabidopsis thaliana protein match is: unknown protein (TAIR:AT5G56980.1); Has 30201 Blast hits to 17322 proteins in 780 species: Archae - 12; Bacteria - 1396; Metazoa - 17338; Fungi - 3422; Plants - 5037; Viruses - 0; Other Eukaryotes - 2996 (source: NCBI BLink).		50.898	28.427	43.075	50.58	38.834	28.58	19.403	66.06	47.475	25.251	23.671	22.373	37.193	28.196	16.241	26.844	43.212	33.013	46.555	43.241	31.254	30.322	780.698		PtpAffx.36115.1.S1_at	10.8924	9.9372	9.79412	10.2897
6	Potri.006G229300		LG_6	24024411	24031817		4.06	mD3yOR		Glycine cleavage system P-protein	GLYCINE DEHYDROGENASE		Glycine dehydrogenase (decarboxylating).	glycine dehydrogenase [EC:1.4.4.2]	AT4G33010.1	AtGLDP1,GLDP1	glycine decarboxylase P-protein 1		glycine decarboxylase P-protein 1 (GLDP1); FUNCTIONS IN: glycine dehydrogenase (decarboxylating) activity, protein binding; INVOLVED IN: glycine catabolic process, response to cadmium ion, glycine decarboxylation via glycine cleavage system; LOCATED IN: mitochondrion, apoplast, glycine cleavage complex, chloroplast, chloroplast envelope; EXPRESSED IN: 31 plant structures; EXPRESSED DURING: 16 gro…		7.818	10.249	6.67	2.868	26.75	2.822	2.664	3.685	1.615	19.706	4.72	10.84	1.938	2.24	10.763	2.075	2.469	5.931	1.755	5.137	2.791	26.697	162.203		PtpAffx.19705.1.A1_at	10.8034	10.4084	10.805	11.8528
6	Potri.006G230000		LG_6	24069140	24071204		4.06	mD3yOR							AT5G11810.1				unknown protein; Has 1807 Blast hits to 1807 proteins in 277 species: Archae - 0; Bacteria - 0; Metazoa - 736; Fungi - 347; Plants - 385; Viruses - 0; Other Eukaryotes - 339 (source: NCBI BLink).		2.37	2.443	2.532	2.98	2.238	2.074	2.323	1.49	3.732	1.425	1.935	1.756	2.208	2.229	1.813	2.535	2.62	2.64	2.837	2.262	2.486	2.1	51.028		PtpAffx.109285.1.S1_at	9.91136	10.0629	9.66709	9.7099
6	Potri.006G231000		LG_6	24158525	24165613		4.06	mD3yOR			PROTEIN PHOSPHATASE PP2A REGULATORY SUBUNIT B			protein phosphatase 2 (formerly 2A), regulatory subunit B	AT1G17720.1	ATB BETA	Protein phosphatase 2A, regulatory subunit PR55	type 2A protein serine/threonine phosphatase 55 kDa B	ATB BETA; CONTAINS InterPro DOMAIN/s: WD40 repeat-like-containing domain (InterPro:IPR011046), Protein phosphatase 2A, regulatory subunit PR55 (InterPro:IPR000009), Protein phosphatase 2A, regulatory subunit PR55, conserved site (InterPro:IPR018067), WD40 repeat, conserved site (InterPro:IPR019775), WD40/YVTN repeat-like-containing domain (InterPro:IPR015943), WD40 repeat (InterPro:IPR001680), WD…		2.557	2.338	2.416	3.47	2.881	3.282	2.933	2.706	3.771	3.572	3.322	3.53	4.115	3.99	4.194	3.933	3.872	4.272	3.949	5.073	5.04	3.988	79.204		PtpAffx.52935.1.A1_a_at	10.6126	10.7101	10.9304	11.1349
6	Potri.006G231700		LG_6	24190674	24193764		4.06	mD3yOR			NADH DEHYDROGENASE		NADH dehydrogenase.		AT5G11770.1		NADH-ubiquinone oxidoreductase 20 kDa subunit, mitochondrial		NADH-ubiquinone oxidoreductase 20 kDa subunit, mitochondrial; FUNCTIONS IN: NADH dehydrogenase (ubiquinone) activity, zinc ion binding; INVOLVED IN: oxidation reduction, mitochondrial electron transport, NADH to ubiquinone; LOCATED IN: mitochondrion, respiratory chain complex I; EXPRESSED IN: 25 plant structures; EXPRESSED DURING: 15 growth stages; CONTAINS InterPro DOMAIN/s: NADH:ubiquinone oxid…		57.138	56.645	64.541	50.094	50.112	61.133	62.289	57.788	25.388	61.338	72.296	72.56	50.74	48.618	57.734	100.385	84.193	60.443	89.296	71.631	75.565	70.313	1400.24		Ptp.2637.1.S1_s_at	12.2183	12.0329	11.6181	12.2106
18	Potri.018G130500		LG_18	15203966	15207431		5.03	mD3yOR		Kinase-like	SERINE/THREONINE KINASE	Serine/threonine protein kinase	Non-specific serine/threonine protein kinase.		AT5G35410.1	ATSOS2,CIPK24,SNRK3.11,SOS2	Protein kinase superfamily protein	encodes a member of the CBL-interacting protein kinase family, is a regulatory component controlling plant potassium nutrition	SALT OVERLY SENSITIVE 2 (SOS2); CONTAINS InterPro DOMAIN/s: Protein kinase, ATP binding site (InterPro:IPR017441), Serine/threonine-protein kinase domain (InterPro:IPR002290), NAF/FISL domain (InterPro:IPR018451), Serine/threonine-protein kinase-like domain (InterPro:IPR017442), Protein kinase-like domain (InterPro:IPR011009), Serine/threonine-protein kinase, active site (InterPro:IPR008271), NAF…		0.538	0.709	0.923	1.571	0.577	0.722	0.546	1.227	2.064	0.884	0.999	0.816	1.272	1.453	0.91	1.243	1.448	1.783	1.038	1.453	1.502	0.909	24.587		PtpAffx.82539.1.A1_at	10.0773	9.35362	9.12962	9.29946
18	Potri.018G130800		LG_18	15213463	15217198		5.03	mD3yOR		F-box-like	FAMILY NOT NAMED	Leucine rich repeat proteins, some proteins contain F-box		EIN3-binding F-box protein	AT2G25490.1	EBF1,FBL6	EIN3-binding F box protein 1	Encodes an F-box protein involved in the ubiquitin/proteasome-dependent proteolysis of EIN3.	EIN3-binding F box protein 1 (EBF1); CONTAINS InterPro DOMAIN/s: F-box domain, cyclin-like (InterPro:IPR001810), F-box domain, Skp2-like (InterPro:IPR022364), Leucine-rich repeat, cysteine-containing subtype (InterPro:IPR006553); BEST Arabidopsis thaliana protein match is: EIN3-binding F box protein 2 (TAIR:AT5G25350.1); Has 13069 Blast hits to 4728 proteins in 296 species: Archae - 0; Bacteria -…		12.196	16.127	17.995	60.615	13.395	10.221	10.523	37.889	20.108	14.271	14.908	16.216	105	113.113	18.537	48.292	47.461	63.394	43.196	36.685	43.941	29.995	794.078		PtpAffx.13062.1.A1_s_at	11.1115	11.0222	10.8037	10.321
18	Potri.018G131000		LG_18	15232753	15234965		5.03	mD3yOR		Ribosomal protein L36	FAMILY NOT NAMED	Mitochondrial/chloroplast ribosomal protein L36		large subunit ribosomal protein L36	AT5G20180.2		Ribosomal protein L36		Ribosomal protein L36; FUNCTIONS IN: structural constituent of ribosome; INVOLVED IN: translation, ribosome biogenesis; LOCATED IN: ribosome, intracellular; EXPRESSED IN: 24 plant structures; EXPRESSED DURING: 15 growth stages; CONTAINS InterPro DOMAIN/s: Ribosomal protein L36 (InterPro:IPR000473); Has 4494 Blast hits to 4494 proteins in 2031 species: Archae - 0; Bacteria - 3621; Metazoa - 52; Fu…		13.168	10.961	13.147	11.462	9.746	10.141	12.607	6.934	16.082	7.153	10.939	9.806	8.334	7.593	7.413	12.572	11.375	13.478	16.481	10.941	10.713	7.345	238.391		PtpAffx.90841.1.A1_s_at	11.5584	11.049	10.1971	10.7928
18	Potri.018G132000		LG_18	15300579	15302969		5.03	mD3yOR		ABC transporter	FAMILY NOT NAMED		Xenobiotic-transporting ATPase.		AT1G67940.1	ATNAP3,AtSTAR1,NAP3	non-intrinsic ABC protein 3	member of NAP subfamily	non-intrinsic ABC protein 3 (NAP3); FUNCTIONS IN: transporter activity; INVOLVED IN: phosphate transport; LOCATED IN: plasma membrane; EXPRESSED IN: 23 plant structures; EXPRESSED DURING: 13 growth stages; CONTAINS InterPro DOMAIN/s: Phosphate transport system permease protein 1 (InterPro:IPR005670), ATPase, AAA+ type, core (InterPro:IPR003593), ABC transporter-like (InterPro:IPR003439), ABC tran…		13.069	7.181	9.238	5.031	3.868	12.676	9.221	66.849	3.938	2.514	3.816	2.554	4.14	4.347	2.539	10.006	4.063	9.227	5.283	3.967	5.895	2.569	191.991		Ptp.4404.1.S1_at	10.9265	10.2295	9.47391	9.44052
18	Potri.018G132100		LG_18	15305402	15306576		5.03	mD3yOR			PHOSPHOLIPASE A2		Phospholipase A(2).		AT2G06925.1	ATSPLA2-ALPHA,PLA2-ALPHA	Phospholipase A2 family protein	Encodes a secretory phospholipase A2 enzyme, which specifically hydrolyzes the sn-2 position of phospholipids. The enzyme has a preference towards linoleoyl acyl chain over palmitoyl acyl chain. It also has a slight preference for phosphatidylcholine over phosphatidylethanolamine.	PLA2-ALPHA; FUNCTIONS IN: phospholipase A2 activity; INVOLVED IN: phospholipid metabolic process, lipid catabolic process; LOCATED IN: vacuole; EXPRESSED IN: 22 plant structures; EXPRESSED DURING: 13 growth stages; CONTAINS InterPro DOMAIN/s: Phospholipase A2 (InterPro:IPR016090), Phospholipase A2, active site (InterPro:IPR013090), Phospholipase A2, eukaryotic (InterPro:IPR001211); BEST Arabidops…		4.143	9.71	8.08	10.599	12.247	9.438	7.311	5.116	1.199	12.68	18.098	15.84	12.811	11.824	12.237	3.951	5.449	16.939	4.563	12.096	15.583	9.393	219.307		PtpAffx.11231.1.S1_at	11.2513	10.782	10.3064	10.9155
18	Potri.018G133400		LG_18	15383343	15386075		5.03	mD3yOR		Glutaredoxin	GLUTAREDOXIN	Glutaredoxin and related proteins	Thioredoxin-disulfide reductase.	glutaredoxin 3	AT5G20500.1		Glutaredoxin family protein		Glutaredoxin family protein; FUNCTIONS IN: electron carrier activity, arsenate reductase (glutaredoxin) activity, protein disulfide oxidoreductase activity; INVOLVED IN: cell redox homeostasis; LOCATED IN: endomembrane system; EXPRESSED IN: 24 plant structures; EXPRESSED DURING: 15 growth stages; CONTAINS InterPro DOMAIN/s: Glutaredoxin (InterPro:IPR002109), Glutaredoxin active site (InterPro:IPR…		55.989	45.429	48.366	27.023	30.185	40.083	49.619	29.594	6.116	27.647	45.044	35.049	21.445	20.63	29.911	17.496	18.423	25.859	26.252	28.94	30.392	21.953	681.445		PtpAffx.128949.1.A1_s_at	11.0717	10.7241	10.3597	11.0405
18	Potri.018G133500		LG_18	15389394	15390724		5.03	mD3yOR		Eukaryotic protein of unknown function (DUF872)	C20ORF30 PROTEIN	Predicted membrane protein			AT4G29850.1		Eukaryotic protein of unknown function (DUF872)		Eukaryotic protein of unknown function (DUF872); CONTAINS InterPro DOMAIN/s: Uncharacterised protein family UPF0414, transmembrane (InterPro:IPR008590); BEST Arabidopsis thaliana protein match is: Eukaryotic protein of unknown function (DUF872) (TAIR:AT2G19350.1); Has 271 Blast hits to 271 proteins in 72 species: Archae - 0; Bacteria - 0; Metazoa - 167; Fungi - 0; Plants - 98; Viruses - 0; Other …		9.545	7.97	8.932	18.592	4.268	22.86	16.762	29.031	15.205	8.755	11.162	9.115	12.244	15.145	8.134	16.56	17.85	13.452	18.583	18.423	19.022	7.968	309.578		PtpAffx.15785.2.A1_s_at	11.4659	11.0187	10.3364	11.9883
18	Potri.018G137500		LG_18	15701780	15709436		5.03	mD3yOR		Cleft lip and palate transmembrane protein 1 (CLPTM1)	CLEFT LIP AND PALATE ASSOCIATED TRANSMEMBRANE PROTEIN-RELATED				AT5G23575.1		Transmembrane CLPTM1 family protein		Transmembrane CLPTM1 family protein; INVOLVED IN: biological_process unknown; LOCATED IN: endoplasmic reticulum, membrane; EXPRESSED IN: callus, leaf; CONTAINS InterPro DOMAIN/s: Cleft lip and palate transmembrane 1 (InterPro:IPR008429); BEST Arabidopsis thaliana protein match is: Transmembrane CLPTM1 family protein (TAIR:AT5G08500.1); Has 30201 Blast hits to 17322 proteins in 780 species: Archae…		0.667	0.583	0.221	0.302	0.251	0.734	0.776	0.141	0.603	0.276	0.251	0.317	0.333	0.309	0.305	0.408	0.463	0.403	0.35	0.265	0.296	0.286	8.54		PtpAffx.66631.1.S1_a_at	9.66524	9.69791	9.69836	9.66865
18	Potri.018G139600		LG_18	15916196	15920161		5.03	mD3yOR		OST3 / OST6 family	FAMILY NOT NAMED	Predicted membrane protein			AT4G29870.1		Oligosaccharyltransferase complex/magnesium transporter family protein		Oligosaccharyltransferase complex/magnesium transporter family protein; FUNCTIONS IN: molecular_function unknown; INVOLVED IN: biological_process unknown; LOCATED IN: plasma membrane; EXPRESSED IN: 22 plant structures; EXPRESSED DURING: 13 growth stages; CONTAINS InterPro DOMAIN/s: Oligosaccharyltransferase complex/magnesium transporter (InterPro:IPR021149); BEST Arabidopsis thaliana protein matc…		11.924	8.973	11.016	8.505	7.107	11.156	12.972	6.471	4.039	8.476	11.41	11.138	8.5	8.11	8.323	9.428	9.189	9.897	11.403	10.177	9.127	6.891	204.232		PtpAffx.31623.1.A1_at	11.6362	11.7869	11.3617	12.0188
18	Potri.018G146100		LG_18	16556879	16559516		4.2	2D3yOR		Cytochrome P450	FAMILY NOT NAMED	Cytochrome P450 CYP2 subfamily	Trans-cinnamate 4-monooxygenase.	trans-cinnamate 4-monooxygenase [EC:1.14.13.11]	AT2G30490.1	ATC4H,C4H,CYP73A5,REF3	cinnamate-4-hydroxylase	Encodes a cinnamate-4-hydroxylase. Mutations in this gene impact phenylpropanoid metabolism, growth and development.	cinnamate-4-hydroxylase (C4H); FUNCTIONS IN: trans-cinnamate 4-monooxygenase activity; INVOLVED IN: in 9 processes; LOCATED IN: endoplasmic reticulum, plasma membrane, membrane, plant-type cell wall; EXPRESSED IN: 25 plant structures; EXPRESSED DURING: 14 growth stages; CONTAINS InterPro DOMAIN/s: Cytochrome P450 (InterPro:IPR001128), Cytochrome P450, E-class, group I (InterPro:IPR002401), Cytoch…		15.178	4.301	8.138	24.826	0.345	2.061	3.625	2.446	1.024	1.854	9.859	2.529	2.583	8.016	7.05	4.135	3.211	59.865	9.971	11.078	7.74	1.478	191.313		PtpAffx.12353.1.A1_at	9.69139	8.69239	7.19437	10.6259
18	Potri.018G149400		LG_18	16750344	16766119		4.2	2D3yOR		Variant SH3 domain					AT2G07360.1		SH3 domain-containing protein		SH3 domain-containing protein; FUNCTIONS IN: binding; LOCATED IN: cytosol, nucleus, plasma membrane, membrane; EXPRESSED IN: 26 plant structures; EXPRESSED DURING: 15 growth stages; CONTAINS InterPro DOMAIN/s: Src homology-3 domain (InterPro:IPR001452), Armadillo-type fold (InterPro:IPR016024); Has 35333 Blast hits to 34131 proteins in 2444 species: Archae - 798; Bacteria - 22429; Metazoa - 974; …		3.42	2.743	2.948	2.608	2.258	2.342	2.468	1.955	3.928	2.504	2.753	2.867	3.229	2.984	3.878	2.958	3.047	4.031	2.333	3.754	3.312	2.128	64.448		PtpAffx.9703.1.A1_a_at	10.6885	11.0361	11.5653	11.7849
18	Potri.018G150400		LG_18	16818265	16823062		4.2	2D3yOR		X8 domain	FAMILY NOT NAMED		Glucan endo-1,3-beta-D-glucosidase.		AT5G58090.1		O-Glycosyl hydrolases family 17 protein		O-Glycosyl hydrolases family 17 protein; FUNCTIONS IN: cation binding, hydrolase activity, hydrolyzing O-glycosyl compounds, catalytic activity; INVOLVED IN: carbohydrate metabolic process; LOCATED IN: anchored to plasma membrane, plasma membrane, anchored to membrane; EXPRESSED IN: 24 plant structures; EXPRESSED DURING: 13 growth stages; CONTAINS InterPro DOMAIN/s: X8 (InterPro:IPR012946), Glyco…		14.548	15.035	16.071	8.358	12.821	7.668	7.524	4.887	9.064	11.116	13.919	13.502	13.219	11.537	16.409	19.766	24.843	11.076	22.065	14.662	14.631	14.055	296.776		PtpAffx.157406.1.S1_at	9.3363	10.7445	10.7295	9.73965
18	Potri.018G150900		LG_18	16854381	16859795		4.2	2D3yOR		Vacuolar protein sorting-associated protein 26	VACUOLAR PROTEIN SORTING 26 RELATED				AT5G53530.1	VPS26A	vacuolar protein sorting 26A	Homolog of yeast retromer subunit VPS26. Part of a retromer-like protein complex involved in endosome to lysosome protein transport.	vacuolar protein sorting 26A (VPS26A); CONTAINS InterPro DOMAIN/s: Vacuolar protein sorting-associated protein 26 (InterPro:IPR005377); BEST Arabidopsis thaliana protein match is: vacuolar protein sorting 26B (TAIR:AT4G27690.1); Has 1807 Blast hits to 1807 proteins in 277 species: Archae - 0; Bacteria - 0; Metazoa - 736; Fungi - 347; Plants - 385; Viruses - 0; Other Eukaryotes - 339 (source: NCBI…		1.391	1.108	1.282	1.701	0.796	1.577	1.447	1.411	2.255	1.295	1.388	1.256	1.889	1.895	1.345	1.493	1.565	1.525	1.716	1.834	1.792	1.365	33.326		PtpAffx.50261.1.A1_s_at	9.59043	10.0285	10.0402	10.2126
[truncated: 2 more columns]

## Sheet: Bark Thickness
Table S5. The 90th percentile candidate genes within the ninety four QTL detected in Populus Family 52-124. Physical localization, annotation and expression profile of gene models in the 90th percentile with high expression within LOD peaks for each QTL interval for all traits.
Linkage Group	Gene Name		Location in the genome sequence				LOD score	Population (with		Annotation											Tissue (expression FPKM)																						Total Expression		Affymetrix Microarrays expression
			Scaffold	Gene Start (bp)	Gene End (bp)		(peak)	highest LOD score)		PFAM Description	Panther Description	KOG Desctiption	EC Description	KO Description	TAIR10	TAIR10 symbol	TAIR10 short_description	TAIR10 Curator_summary	TAIR10 Computational_description		BESC423.ZL 7 female early	BESC443.ZG 43 female receptive	BESC842.ZI 22 female late	Early dormant bud.early dormant bud	Fully open bud.fully open bud	GW9592.ZK 10 male early	GW9840.ZE 30 male early	Leaf first fully expanded.standard	Leaf immature.standard	Leaf young.standard	Predormant bud I	Predormant bud II	Root tip.standard	Root.ammonia	Root.nitrate	Root.standard	Root.urea	Stem inode.standard	Stem node.standard	Stem.ammonia	Stem.nitrate	Stem.urea			Probesets	Bark and mature phloem	Developing Phloem	Cambium	Developing Xylem
1	Potri.001G161600		LG_1	13495197	13503611		5.68	2BTh3yOR		Leucine rich repeat N-terminal domain		Serine/threonine protein kinase	Non-specific serine/threonine protein kinase.		AT1G53730.1	SRF6	STRUBBELIG-receptor family 6		STRUBBELIG-receptor family 6 (SRF6); FUNCTIONS IN: protein serine/threonine kinase activity, protein kinase activity, ATP binding; INVOLVED IN: transmembrane receptor protein tyrosine kinase signaling pathway, protein amino acid phosphorylation; LOCATED IN: plasma membrane; EXPRESSED IN: 22 plant structures; EXPRESSED DURING: 13 growth stages; CONTAINS InterPro DOMAIN/s: Protein kinase, ATP bindi…		20.583	18.342	16.372	10.779	14.788	12.132	13.256	16.841	9.317	19.077	14.564	17.23	12.249	11.635	17.418	20.823	18.635	17.702	16.529	12.272	12.762	13.65	336.956		PtpAffx.60420.1.S1_at	10.5711	11.2295	11.4181	11.1768
1	Potri.001G161700		LG_1	13504911	13508518		5.68	2BTh3yOR		AAA domain (Cdc48 subfamily)	26S PROTEASE REGULATORY SUBUNIT		Proteasome endopeptidase complex.		AT1G53750.1	RPT1A	regulatory particle triple-A 1A	26S proteasome AAA-ATPase subunit RPT1a (RPT1a) mRNA,	regulatory particle triple-A 1A (RPT1A); FUNCTIONS IN: ATPase activity; INVOLVED IN: ubiquitin-dependent protein catabolic process; LOCATED IN: proteasome regulatory particle, base subcomplex, proteasome complex, nucleus, plasma membrane; EXPRESSED IN: pollen tube; CONTAINS InterPro DOMAIN/s: ATPase, AAA+ type, core (InterPro:IPR003593), ATPase, AAA-type, core (InterPro:IPR003959), ATPase, AAA-ty…		6.639	6.578	6.906	8.205	5.367	5.796	5.151	5.072	16.3	3.724	4.642	4.003	6.126	5.978	4.428	8.909	9.126	6.819	7.132	5.85	5.964	5.921	144.636		PtpAffx.6885.1.S1_at	11.1711	11.2163	11.0426	10.9315
1	Potri.001G162100		LG_1	13537297	13538788		5.68	2BTh3yOR							AT3G06840.1				unknown protein; BEST Arabidopsis thaliana protein match is: unknown protein (TAIR:AT5G49170.1); Has 33 Blast hits to 33 proteins in 9 species: Archae - 0; Bacteria - 0; Metazoa - 0; Fungi - 0; Plants - 33; Viruses - 0; Other Eukaryotes - 0 (source: NCBI BLink).		2.892	0.663	0.912	0.178	0.281	3.947	3.746	0.247	0.142	0.803	0.54	0.427	0.131	0.106	0.529	1.81	2.286	0.816	2.046	11.691	6.847	1.772	42.812		Ptp.5577.2.S1_s_at	10.0367	12.0596	12.4014	12.1598
1	Potri.001G162200		LG_1	13540040	13545385		5.68	2BTh3yOR		Ubiquitin-conjugating enzyme	UBIQUITIN-CONJUGATING ENZYME E2	Ubiquitin-protein ligase	Ubiquitin--protein ligase.	ubiquitin-conjugating enzyme E2 J2 [EC:6.3.2.19]	AT5G50430.1	UBC33	ubiquitin-conjugating enzyme 33		ubiquitin-conjugating enzyme 33 (UBC33); FUNCTIONS IN: ubiquitin-protein ligase activity; INVOLVED IN: regulation of protein metabolic process, post-translational protein modification; LOCATED IN: cellular_component unknown; CONTAINS InterPro DOMAIN/s: Ubiquitin-conjugating enzyme/RWD-like (InterPro:IPR016135), Ubiquitin-conjugating enzyme, E2 (InterPro:IPR000608); BEST Arabidopsis thaliana prote…		1.321	1.488	1.575	2.157	1.29	1.476	1.452	1.439	2.607	1.512	1.758	1.374	1.799	1.789	1.439	2.156	2.255	2.278	2.37	2.983	2.977	1.956	41.451		PtpAffx.28706.1.S1_at	11.9543	11.9874	11.7795	11.899
1	Potri.001G162400		LG_1	13572080	13577414		5.68	2BTh3yOR		Plant invertase/pectin methylesterase inhibitor	FAMILY NOT NAMED		Pectinesterase.	pectinesterase [EC:3.1.1.11]	AT3G14310.1	ATPME3,PME3	pectin methylesterase 3	encodes a pectin methylesterase, targeted by a cellulose binding protein (CBP) from the parasitic nematode Heterodera schachtii during parasitism.	pectin methylesterase 3 (PME3); FUNCTIONS IN: pectinesterase activity; INVOLVED IN: response to nematode; LOCATED IN: cell wall, apoplast, plasma membrane, cytoplasm; EXPRESSED IN: 23 plant structures; EXPRESSED DURING: 14 growth stages; CONTAINS InterPro DOMAIN/s: Pectinesterase, active site (InterPro:IPR018040), Pectin lyase fold/virulence factor (InterPro:IPR011050), Pectinesterase, catalytic …		99.434	90.049	100.773	1.861	6.976	88.523	122.647	13.679	0.285	10.544	14.214	11.08	5.934	4.199	12.67	10.237	12.672	26.524	11.173	45.55	33.173	10.392	732.589		PtpAffx.9932.2.A1_s_at	11.69	12.7478	12.9359	11.9338
1	Potri.001G162800		LG_1	13606954	13612423		5.8	2BTh3yOR		Aminotransferase class I and II	SUBGROUP I AMINOTRANSFERASE RELATED		Alanine transaminase.	alanine transaminase [EC:2.6.1.2]	AT1G72330.1	ALAAT2	alanine aminotransferase 2	Encodes for alanine aminotransferase ALAAT2.	alanine aminotransferase 2 (ALAAT2); FUNCTIONS IN: copper ion binding, L-alanine:2-oxoglutarate aminotransferase activity, ATP binding; INVOLVED IN: glycolysis, biosynthetic process, L-alanine biosynthetic process from pyruvate, L-alanine catabolic process, by transamination; LOCATED IN: mitochondrion; CONTAINS InterPro DOMAIN/s: 1-aminocyclopropane-1-carboxylate synthase (InterPro:IPR001176), Py…		7.499	8.719	8.789	8.104	7.614	5.187	7.036	4.029	5.991	0.943	2.883	1.395	2.286	2.33	2.719	16.412	5.478	11.677	10.331	2.444	3.352	8.235	133.453		PtpAffx.42221.1.A1_s_at	10.8668	11.0553	10.8846	10.7679
1	Potri.001G162900		LG_1	13613774	13616199		5.8	2BTh3yOR		Proteasome subunit	PROTEASOME SUBUNIT ALPHA/BETA	20S proteasome, regulatory subunit alpha type PSMA5/PUP2	Proteasome endopeptidase complex.		AT3G14290.1	PAE2	20S proteasome alpha subunit E2	Encodes 20S proteasome subunit PAE2 (PAE2) that has RNase activity.	20S proteasome alpha subunit E2 (PAE2); FUNCTIONS IN: peptidase activity, endopeptidase activity, threonine-type endopeptidase activity; INVOLVED IN: ubiquitin-dependent protein catabolic process; LOCATED IN: proteasome core complex, proteasome complex, cytosolic ribosome; EXPRESSED IN: 23 plant structures; EXPRESSED DURING: 15 growth stages; CONTAINS InterPro DOMAIN/s: Proteasome, alpha-subunit,…		7.634	7.48	8.906	8.424	8.722	10.366	9.708	6.935	7.354	9.53	12.973	10.895	5.855	5.16	9.082	8.163	7.621	9.778	10.163	11.135	10.156	7.348	193.388		PtpAffx.42665.3.S1_a_at	10.4589	10.7257	10.2125	10.581
1	Potri.001G163100		LG_1	13642611	13644083		5.8	2BTh3yOR							AT3G14280.1				unknown protein; Has 51 Blast hits to 51 proteins in 13 species: Archae - 0; Bacteria - 0; Metazoa - 0; Fungi - 0; Plants - 51; Viruses - 0; Other Eukaryotes - 0 (source: NCBI BLink).		31.563	49.796	34.906	9.52	6.612	23.907	21.044	14.029	31.202	5.489	13.959	8.269	11.801	10.869	7.95	30.04	33.065	13.647	34.741	33.877	33.301	17.031	476.618		PtpAffx.95107.1.A1_s_at	11.163	10.4055	7.81463	10.3056
1	Potri.001G163200		LG_1	13644506	13653321		5.8	2BTh3yOR		FYVE zinc finger	CHAPERONIN		1-phosphatidylinositol-3-phosphate 5-kinase.	1-phosphatidylinositol-3-phosphate 5-kinase [EC:2.7.1.150]	AT3G14270.1	FAB1B	phosphatidylinositol-4-phosphate 5-kinase family protein	Encodes a protein that is predicted to act as a 1-phosphatidylinositol-3-phosphate (PtdIns3P) 5-kinase based on its homology to Fab1 from yeast. It contains an FYVE domain required for binding to PtdIns3P-containing membranes in yeast, as well as a Cpn60_TCP1 homology domain plus a kinase domain. fab1a/fab1b pollen grains not viable and have defective vacuolar organization. FAB1A and FAB1B comple…	FORMS APLOID AND BINUCLEATE CELLS 1B (FAB1B); CONTAINS InterPro DOMAIN/s: Chaperonin Cpn60/TCP-1 (InterPro:IPR002423), Zinc finger, FYVE-type (InterPro:IPR000306), Zinc finger, FYVE-related (InterPro:IPR017455), Zinc finger, FYVE/PHD-type (InterPro:IPR011011), Phosphatidylinositol-4-phosphate 5-kinase, core (InterPro:IPR002498); BEST Arabidopsis thaliana protein match is: 1-phosphatidylinositol-4…		1.405	1.53	1.786	1.865	1.617	1.603	1.806	2.162	2.811	1.456	1.103	1.415	2.6	2.913	2.288	2.321	2.664	2.466	1.957	1.8	1.946	2.039	43.553		PtpAffx.27728.2.A1_s_at	9.07196	9.43745	9.766	9.71326
1	Potri.001G163600		LG_1	13678911	13682081		5.8	2BTh3yOR		Peptidase inhibitor I9	PROPROTEIN CONVERTASE SUBTILISIN/KEXIN		Tripeptidyl-peptidase II.		AT3G14240.1		Subtilase family protein		Subtilase family protein; FUNCTIONS IN: identical protein binding, serine-type endopeptidase activity; INVOLVED IN: proteolysis, negative regulation of catalytic activity; LOCATED IN: endomembrane system; EXPRESSED IN: 22 plant structures; EXPRESSED DURING: 13 growth stages; CONTAINS InterPro DOMAIN/s: Protease-associated PA (InterPro:IPR003137), Proteinase inhibitor, propeptide (InterPro:IPR0090…		17.923	16.372	19.594	29.796	10.925	2.011	4.076	1.922	7.924	11.542	13.053	13.313	35.4	29.199	18.111	18.111	11.717	7.594	6.378	19.247	24.531	8.495	327.234		PtpAffx.225305.1.S1_s_at	11.1986	10.8231	10.8677	10.3925
1	Potri.001G163700		LG_1	13695168	13698032		5.8	2BTh3yOR		AP2 domain	FAMILY NOT NAMED			EREBP-like factor	AT1G53910.3	RAP2.12	related to AP2 12	Encodes a member of the ERF (ethylene response factor) subfamily B-2 of ERF/AP2 transcription factor family (RAP2.12). The protein contains one AP2 domain. There are 5 members in this subfamily including RAP2.2 AND RAP2.12. Involved in oxygen sensing.	related to AP2 12 (RAP2.12); FUNCTIONS IN: DNA binding, sequence-specific DNA binding transcription factor activity; INVOLVED IN: regulation of transcription, DNA-dependent; LOCATED IN: nucleus; EXPRESSED IN: 23 plant structures; EXPRESSED DURING: 14 growth stages; CONTAINS InterPro DOMAIN/s: DNA-binding, integrase-type (InterPro:IPR016177), Pathogenesis-related transcriptional factor/ERF, DNA-bi…		13.703	15.201	15.33	19.71	6.661	16.61	17.982	18.253	19.908	11.533	12.987	10.191	12.76	13.601	10.749	21.194	20.6	29.099	18.164	20.499	18.582	9.886	353.203		PtpAffx.29344.1.A1_at	11.0117	10.7707	10.1612	10.7348
1	Potri.001G164000		LG_1	13733174	13736782		5.8	2BTh3yOR		Ribosomal protein S2	40S RIBOSOMAL PROTEIN SA	40S ribosomal protein SA (P40)/Laminin receptor 1		small subunit ribosomal protein SAe	AT1G72370.1	AP40,P40,RP40,RPSAA	40s ribosomal protein SA	acidic protein associated to 40S ribosomal subunit of ribosomes. Involved in polysome formation during active protein synthesis. Expressed in actively growing tissue.	40s ribosomal protein SA (P40); FUNCTIONS IN: structural constituent of ribosome; INVOLVED IN: response to salt stress, mature ribosome assembly, translation, response to osmotic stress; LOCATED IN: in 8 components; EXPRESSED IN: 25 plant structures; EXPRESSED DURING: 14 growth stages; CONTAINS InterPro DOMAIN/s: Ribosomal protein S2 (InterPro:IPR001865), Ribosomal protein S2, conserved site (Int…		42.505	38.329	39.714	35.28	31.493	21.156	25.851	11.83	32.705	20.298	39.306	35.832	31.795	30.407	29.737	30.983	29.333	29.283	41.243	26.768	25.766	26.262	675.876		PtpAffx.17919.1.S1_at	10.9476	11.5235	11.3211	10.7527
1	Potri.001G165600		LG_1	13880975	13885934		5.8	2BTh3yOR		Synaptobrevin	SNARE PROTEINS	Synaptobrevin/VAMP-like protein SEC22		vesicle transport protein SEC22	AT1G11890.1	ATSEC22,SEC22	Synaptobrevin family protein	member of SEC22 Gene Family	SECRETION 22 (SEC22); FUNCTIONS IN: transporter activity; INVOLVED IN: transport, vesicle-mediated transport; LOCATED IN: Golgi apparatus, endoplasmic reticulum, plasma membrane, membrane; EXPRESSED IN: 26 plant structures; EXPRESSED DURING: 15 growth stages; CONTAINS InterPro DOMAIN/s: Longin (InterPro:IPR010908), Longin-like (InterPro:IPR011012), Synaptobrevin (InterPro:IPR001388); BEST Arabido…		5.358	4.507	6.296	5.868	4.291	8.176	8.654	6.5	8.125	5.513	6.504	5.781	5.798	5.175	4.608	5.061	5.101	5.006	5.583	7.469	6.99	4.622	130.986		Ptp.2801.1.A1_at	10.7656	10.8149	10.7007	11.2872
1	Potri.001G165900		LG_1	13910819	13924005		5.8	2BTh3yOR		Nuclear pore protein 84 / 107	NUP107-RELATED			nuclear pore complex protein Nup107	AT3G14120.2				FUNCTIONS IN: molecular_function unknown; INVOLVED IN: transport; LOCATED IN: nuclear pore; EXPRESSED IN: 23 plant structures; EXPRESSED DURING: 13 growth stages; CONTAINS InterPro DOMAIN/s: Nuclear pore protein 84/107 (InterPro:IPR007252); Has 271 Blast hits to 268 proteins in 107 species: Archae - 0; Bacteria - 0; Metazoa - 138; Fungi - 69; Plants - 52; Viruses - 0; Other Eukaryotes - 12 (sourc…		2.755	3.041	3.009	4.149	1.913	1.657	2.242	1.009	5.295	1.742	3.097	2.536	5.312	5.451	3.819	3.815	3.15	3.339	2.225	2.862	3.049	1.746	67.213		PtpAffx.217034.1.S1_s_at	9.31785	9.97491	10.2396	9.54937
1	Potri.001G166100		LG_1	13935000	13940574		5.8	2BTh3yOR		RNA recognition motif. (a.k.a. RRM, RBD, or RNP domain)	FAMILY NOT NAMED	Splicing factor 3b, subunit 4			AT1G17370.1	UBP1B	oligouridylate binding protein 1B	Encodes an RNA?binding protein involved in stress granule formation. Regulated by a transposable element small RNA.	oligouridylate binding protein 1B (UBP1B); FUNCTIONS IN: mRNA 3'-UTR binding; EXPRESSED IN: 23 plant structures; EXPRESSED DURING: 13 growth stages; CONTAINS InterPro DOMAIN/s: RNA recognition motif, RNP-1 (InterPro:IPR000504), Nucleotide-binding, alpha-beta plait (InterPro:IPR012677); BEST Arabidopsis thaliana protein match is: RNA-binding (RRM/RBD/RNP motifs) family protein (TAIR:AT3G14100.1); …		2.436	3.172	3.288	3.613	2.122	2.947	2.833	3.173	6.34	2.795	3.651	3.55	3.772	3.667	3.554	4.833	4.726	3.317	3.868	4.288	4.404	2.739	79.088		PtpAffx.48817.3.S1_at	11.36	11.3759	11.3322	10.9801
1	Potri.001G167100		LG_1	14044447	14050634		5.73	mBTh3yOR		Aldehyde dehydrogenase family	ALDEHYDE DEHYDROGENASE-RELATED		Aldehyde dehydrogenase (NAD(+)).		AT1G54100.1	ALDH7B4	aldehyde dehydrogenase 7B4	Aldehyde dehydrogenase	aldehyde dehydrogenase 7B4 (ALDH7B4); FUNCTIONS IN: 3-chloroallyl aldehyde dehydrogenase activity, oxidoreductase activity; INVOLVED IN: response to desiccation, response to salt stress, response to abscisic acid stimulus; EXPRESSED IN: 23 plant structures; EXPRESSED DURING: 15 growth stages; CONTAINS InterPro DOMAIN/s: Aldehyde/histidinol dehydrogenase (InterPro:IPR016161), Aldehyde dehydrogenas…		3.487	3.881	3.337	1.999	1.118	8.66	5.352	17.736	6.915	0.67	1.136	0.903	1.659	1.695	1.076	2.882	3.141	3.888	9.361	1.608	3.073	2.113	85.69		Ptp.2320.1.S1_a_at	10.5273	10.322	10.297	10.3155
1	Potri.001G167400		LG_1	14063303	14067359		5.73	mBTh3yOR		Anaphase-promoting complex subunit 11 RING-H2 finger	RING BOX	SCF ubiquitin ligase, Rbx1 component		RING-box protein 1	AT5G20570.1	ATRBX1,HRT1,RBX1,ROC1	RING-box 1	Encodes a ring-box 1 like protein and component of the SCF ubiquitinization complex mediating auxin responses. Forms a E3 ubiquitin ligase complex with CUL3A and At1g21780.1 a BTB domain protein.	RING-box 1 (RBX1); CONTAINS InterPro DOMAIN/s: Zinc finger, RING-type (InterPro:IPR001841); BEST Arabidopsis thaliana protein match is: RING/U-box superfamily protein (TAIR:AT3G42830.1); Has 30201 Blast hits to 17322 proteins in 780 species: Archae - 12; Bacteria - 1396; Metazoa - 17338; Fungi - 3422; Plants - 5037; Viruses - 0; Other Eukaryotes - 2996 (source: NCBI BLink).		6.47	5.716	6.464	12.805	7.924	5.728	7.583	4.951	12.671	9.133	13.958	11.857	10.04	9.594	8.558	11.196	11.092	7.319	12.41	11.214	13.478	7.983	208.144		Ptp.3766.1.S1_at	10.532	9.82673	9.03653	9.40361
1	Potri.001G170100		LG_1	14373475	14375573		5.73	mBTh3yOR		Protein of unknown function (DUF1313)					AT1G17455.1	ELF4-L4	ELF4-like 4		ELF4-like 4 (ELF4-L4); CONTAINS InterPro DOMAIN/s: Protein of unknown function DUF1313 (InterPro:IPR009741); BEST Arabidopsis thaliana protein match is: ELF4-like 2 (TAIR:AT1G72630.1); Has 149 Blast hits to 148 proteins in 34 species: Archae - 0; Bacteria - 0; Metazoa - 0; Fungi - 0; Plants - 148; Viruses - 0; Other Eukaryotes - 1 (source: NCBI BLink).		1.792	1.738	2.953	4.882	2.28	3.688	4.186	3.759	15.475	3.195	2.657	2.731	4.242	4.674	2.476	6.154	6.622	4.449	9.283	5.663	5.98	3.288	102.167		PtpAffx.14677.1.A1_at	10.7198	10.1215	9.25068	9.98096
1	Potri.001G170300		LG_1	14398444	14404279		5.73	mBTh3yOR		50S ribosome-binding GTPase	DEVELOPMENTALLY REGULATED GTP-BINDING PROTEIN-RELATED			nucleolar GTP-binding protein	AT1G72660.3		P-loop containing nucleoside triphosphate hydrolases superfamily protein		P-loop containing nucleoside triphosphate hydrolases superfamily protein; FUNCTIONS IN: GTP binding; LOCATED IN: intracellular; EXPRESSED IN: root, flower; EXPRESSED DURING: 4 anthesis; CONTAINS InterPro DOMAIN/s: Small GTP-binding protein (InterPro:IPR005225), TGS (InterPro:IPR004095), GTP1/OBG (InterPro:IPR006073), GTP1/OBG, conserved site (InterPro:IPR006074), GTP-binding protein, HSR1-related…		1.246	1.172	1.366	1.489	0.969	1.247	1.275	1.223	4.021	0.763	0.945	0.842	1.084	1.115	0.827	1.273	1.126	0.981	1.102	1.167	1.185	0.917	27.335		PtpAffx.10485.1.A1_s_at	10.2871	9.97642	9.7861	9.60136
1	Potri.001G170400		LG_1	14414284	14416349		5.73	mBTh3yOR		Snf7	CHARGED MULTIVESICULAR BODY PROTEIN	Vacuolar assembly/sorting protein DID4		charged multivesicular body protein 2A	AT2G06530.1	VPS2.1	SNF7 family protein		VPS2.1; CONTAINS InterPro DOMAIN/s: Snf7 (InterPro:IPR005024); BEST Arabidopsis thaliana protein match is: vacuolar protein sorting-associated protein 2.3 (TAIR:AT1G03950.1); Has 2524 Blast hits to 2516 proteins in 271 species: Archae - 17; Bacteria - 20; Metazoa - 1106; Fungi - 512; Plants - 555; Viruses - 5; Other Eukaryotes - 309 (source: NCBI BLink).		5.164	5.282	5.838	7.453	3.007	5.969	6.999	5.609	7.398	3.917	4.384	4.007	5.157	5.709	3.38	5.398	4.821	5.792	4.378	5.407	6.459	3.97	115.498		PtpAffx.131744.1.S1_at	10.1995	9.75037	9.60504	10.2981
1	Potri.001G171200		LG_1	14529218	14534156		5.73	mBTh3yOR		Peptidase S24-like	SIGNAL PEPTIDASE COMPLEX CATALYTIC SUBUNIT SEC11	Signal peptidase I	Signal peptidase I.	signal peptidase, endoplasmic reticulum-type [EC:3.4.-.-]	AT1G52600.1		Peptidase S24/S26A/S26B/S26C family protein		Peptidase S24/S26A/S26B/S26C family protein; FUNCTIONS IN: peptidase activity; INVOLVED IN: proteolysis, signal peptide processing; LOCATED IN: endoplasmic reticulum, plasma membrane, membrane; EXPRESSED IN: 26 plant structures; EXPRESSED DURING: 14 growth stages; CONTAINS InterPro DOMAIN/s: Peptidase S24/S26A/S26B, conserved region (InterPro:IPR019759), Peptidase S26B, eukaryotic signal peptidas…		5.541	3.958	4.819	2.606	4.603	4.009	4.803	2.075	1.521	4.333	6.103	5.566	2.611	2.21	4.752	3.084	2.918	3.83	3.198	4.817	4.36	3.441	85.158		Ptp.1647.1.S1_at	11.459	11.5185	11.3871	11.8922
6	Potri.006G195000		LG_6	21031362	21035092		6.74	2BTh3yOR			COLON CANCER-ASSOCIATED PROTEIN MIC1				AT3G12010.1				FUNCTIONS IN: molecular_function unknown; INVOLVED IN: biological_process unknown; EXPRESSED IN: sperm cell, cultured cell; CONTAINS InterPro DOMAIN/s: Colon cancer-associated Mic1-like (InterPro:IPR009755); Has 30201 Blast hits to 17322 proteins in 780 species: Archae - 12; Bacteria - 1396; Metazoa - 17338; Fungi - 3422; Plants - 5037; Viruses - 0; Other Eukaryotes - 2996 (source: NCBI BLink).		1.189	1.066	1.201	1.513	1.162	1.447	1.648	0.843	1.225	1.348	1.311	1.428	1.463	1.454	1.571	0.977	0.944	1.556	0.816	1.163	1.25	0.933	27.508		PtpAffx.152289.1.S1_at	9.43747	9.31451	9.44399	9.414
6	Potri.006G195200		LG_6	21120198	21123323		6.74	2BTh3yOR							AT2G41945.1				unknown protein; BEST Arabidopsis thaliana protein match is: unknown protein (TAIR:AT3G04040.1); Has 35333 Blast hits to 34131 proteins in 2444 species: Archae - 798; Bacteria - 22429; Metazoa - 974; Fungi - 991; Plants - 531; Viruses - 0; Other Eukaryotes - 9610 (source: NCBI BLink).		0.262	0.313	0.318	0.527	0.333	0.275	0.333	0.271	1.163	0.323	0.4	0.404	0.367	0.309	0.304	0.409	0.44	0.307	0.582	0.431	0.46	0.632	9.163		PtpAffx.163577.1.S1_at	10.008	9.68519	8.99532	9.57721
6	Potri.006G195400		LG_6	21144016	21145929		6.74	2BTh3yOR		Ribosomal protein L21e	60S RIBOSOMAL PROTEIN L21	60S ribosomal protein L21		large subunit ribosomal protein L21e	AT1G57860.1		Translation protein SH3-like family protein		Translation protein SH3-like family protein; FUNCTIONS IN: structural constituent of ribosome; INVOLVED IN: translation; LOCATED IN: ribosome, cytosolic large ribosomal subunit; EXPRESSED IN: juvenile leaf; CONTAINS InterPro DOMAIN/s: Translation protein SH3-like (InterPro:IPR008991), Ribosomal protein L21e (InterPro:IPR001147), Ribosomal protein L21e, conserved site (InterPro:IPR018259); BEST Ar…		76.838	61.086	63.392	62.253	56.128	41.434	59.505	22.022	38.273	31.321	73.609	57.007	51.714	48.578	47.377	51.871	44.429	47.705	79.634	49.484	47.737	38.151	1149.55		Ptp.47.1.A1_at	11.9652	12.2234	11.8713	11.6604
6	Potri.006G196000		LG_6	21190249	21195637		6.74	2BTh3yOR		Helicase conserved C-terminal domain	FAMILY NOT NAMED		RNA helicase.	ATP-dependent RNA helicase [EC:3.6.4.13]	AT2G42520.1		P-loop containing nucleoside triphosphate hydrolases superfamily protein		P-loop containing nucleoside triphosphate hydrolases superfamily protein; FUNCTIONS IN: helicase activity, nucleic acid binding, ATP binding, ATP-dependent helicase activity; LOCATED IN: peroxisome; EXPRESSED IN: 24 plant structures; EXPRESSED DURING: 15 growth stages; CONTAINS InterPro DOMAIN/s: RNA helicase, DEAD-box type, Q motif (InterPro:IPR014014), DNA/RNA helicase, DEAD/DEAH box type, N-te…		3.215	2.891	2.98	4.084	2.639	3.67	3.555	3.315	6.236	2.937	2.992	3.01	4.791	4.959	4.009	3.337	3.319	4.077	2.622	3.119	2.944	3.282	77.983		Ptp.1322.1.S1_at	9.53773	9.97522	10.1633	10.0566
6	Potri.006G196100		LG_6	21197053	21202473		6.74	2BTh3yOR		Calcineurin-like phosphoesterase	SERINE/THREONINE PROTEIN PHOSPHATASE		Phosphoprotein phosphatase.	protein phosphatase 2 (formerly 2A), catalytic subunit [EC:3.1.3.16]	AT2G42500.1	PP2A-3	protein phosphatase 2A-3	Encodes one of the isoforms of the catalytic subunit of protein phosphatase 2A: AT1G59830/PP2A-1, AT1G10430/PP2A-2, At2g42500/PP2A-3, At3g58500/PP2A-4 [Plant Molecular Biology (1993) 21:475-485 and (1994) 26:523-528; Note that in more recent publications, there is mixed use of gene names for PP2A-3 and PP2A-4 - some refer to At2g42500 as PP2A-3 and some as PP2A-4].	protein phosphatase 2A-3 (PP2A-3); FUNCTIONS IN: hydrolase activity, protein serine/threonine phosphatase activity; INVOLVED IN: biological_process unknown; LOCATED IN: nucleus, plasma membrane, cytoplasm; EXPRESSED IN: male gametophyte, guard cell, pollen tube; EXPRESSED DURING: L mature pollen stage, M germinated pollen stage; CONTAINS InterPro DOMAIN/s: Metallophosphoesterase (InterPro:IPR0048…		0.603	1.19	1.124	3.213	0.495	0.715	0.537	0.622	2.142	1.098	1.264	1.073	2.792	3.035	1.511	1.876	2.238	1.426	2.095	1.747	1.816	1.353	33.965		PtpAffx.127545.1.A1_s_at	10.1401	9.71622	9.34277	9.49123
6	Potri.006G203500		LG_6	21897091	21901262		5.7	mBTh3yOR		Leucine Rich Repeat		Serine/threonine protein kinase	Non-specific serine/threonine protein kinase.		AT2G01820.1		Leucine-rich repeat protein kinase family protein		Leucine-rich repeat protein kinase family protein; FUNCTIONS IN: protein serine/threonine kinase activity, protein kinase activity, ATP binding; INVOLVED IN: pollen development; LOCATED IN: plasma membrane, plant-type cell wall; EXPRESSED IN: 23 plant structures; EXPRESSED DURING: 13 growth stages; CONTAINS InterPro DOMAIN/s: Protein kinase, ATP binding site (InterPro:IPR017441), Protein kinase, …		7.909	8.755	9.027	11.516	13.225	6.032	5.388	5.796	6.187	14.778	8.586	11.102	17.987	18.211	12.394	6.99	6.395	10.042	3.427	11.602	11.295	13.624	220.268		PtpAffx.206417.1.S1_at	10.5579	10.7178	10.6894	9.82503
6	Potri.006G204200		LG_6	21963400	21964519		5.7	mBTh3yOR		Late embryogenesis abundant protein	FAMILY NOT NAMED				AT3G11660.1	NHL1	NDR1/HIN1-like 1	encodes a protein whose sequence is similar to tobacco hairpin-induced gene (HIN1) and Arabidopsis non-race specific disease resistance gene (NDR1). Expression of this gene is induced by cucumber mosaic virus. Localization of the gene product is similar to that of NHL3 (plasma membrane) but it is yet inconclusive.	NDR1/HIN1-like 1 (NHL1); CONTAINS InterPro DOMAIN/s: Late embryogenesis abundant protein, group 2 (InterPro:IPR004864); BEST Arabidopsis thaliana protein match is: Late embryogenesis abundant (LEA) hydroxyproline-rich glycoprotein family (TAIR:AT3G52470.1); Has 917 Blast hits to 917 proteins in 27 species: Archae - 0; Bacteria - 0; Metazoa - 0; Fungi - 0; Plants - 917; Viruses - 0; Other Eukaryot…		32.327	21.39	44.557	221.198	6.097	66.682	82.942	90.959	30.407	31.757	28.502	27.216	199.12	241.089	21.693	91.988	96.488	33.163	79.818	99.377	131.089	29.907	1707.77		PtpAffx.5875.2.A1_a_at	12.6249	10.6047	9.11027	11.7067
6	Potri.006G204600		LG_6	22006547	22015392		5.7	mBTh3yOR		Uncharacterised conserved protein	UNCHARACTERIZED	Uncharacterized conserved protein			AT3G28430.1				unknown protein; FUNCTIONS IN: molecular_function unknown; INVOLVED IN: biological_process unknown; LOCATED IN: mitochondrion; EXPRESSED IN: 17 plant structures; EXPRESSED DURING: 6 growth stages; CONTAINS InterPro DOMAIN/s: Protein of unknown function FPL (InterPro:IPR019155); Has 243 Blast hits to 233 proteins in 101 species: Archae - 0; Bacteria - 0; Metazoa - 110; Fungi - 0; Plants - 53; Viru…		1.336	0.91	1.099	2.313	1.902	1.113	1.304	0.658	1.812	1.873	1.865	1.767	2.683	2.916	2.533	0.953	0.871	1.239	0.595	1.713	1.981	1.255	34.691		Ptp.4103.1.S1_at	8.29515	8.67614	9.27803	9.76884
6	Potri.006G204900		LG_6	22072462	22075899		5.7	mBTh3yOR		C-terminal domain of 1-Cys peroxiredoxin	THIOREDOXIN PEROXIDASE	Alkyl hydroperoxide reductase, thiol specific antioxidant and related enzymes	Peroxiredoxin.	peroxiredoxin (alkyl hydroperoxide reductase subunit C) [EC:1.11.1.15]	AT5G06290.1	2-Cys Prx B,2CPB	2-cysteine peroxiredoxin B	Encodes a 2-Cys peroxiredoxin (2-Cys PrxB) that contains two catalytic Cys residues.	2-cysteine peroxiredoxin B (2-Cys Prx B); FUNCTIONS IN: peroxiredoxin activity, antioxidant activity; INVOLVED IN: response to cold, defense response to bacterium; LOCATED IN: apoplast, stromule, chloroplast stroma, chloroplast; EXPRESSED IN: 23 plant structures; EXPRESSED DURING: 13 growth stages; CONTAINS InterPro DOMAIN/s: Peroxiredoxin, C-terminal (InterPro:IPR019479), Thioredoxin fold (Inter…		13.959	11.643	10.994	6.865	22.399	5.88	6.788	2.658	10.172	9.253	11.123	12.397	4.952	4.609	9.886	2.964	3.093	3.15	3.042	5.687	5.342	10.666	177.522		PtpAffx.3462.1.A1_a_at	9.98802	9.59548	9.26253	9.33102
6	Potri.006G205700		LG_6	22136581	22140321		5.7	mBTh3yOR		Ubiquitin-conjugating enzyme	UBIQUITIN-CONJUGATING ENZYME E2	Ubiquitin-conjugating enzyme E2	Ubiquitin--protein ligase.	ubiquitin-conjugating enzyme E2 variant	AT2G36060.1	MMZ3,UEV1C	MMS ZWEI homologue 3	MMZ3/UEV1C encodes a protein that may play a role in DNA damage responses and error-free post-replicative DNA repair by participating in lysine-63-based polyubiquitination reactions. UEV1C can form diubiquitin and triubiquitin chains in combination with UBC13A/UBC35 in vitro. It can also functionally complement an mms2 mutation in budding yeast, both by increasing mms2 mutant viability in the pre…	MMS ZWEI homologue 3 (MMZ3); CONTAINS InterPro DOMAIN/s: Ubiquitin-conjugating enzyme/RWD-like (InterPro:IPR016135), Ubiquitin-conjugating enzyme, E2 (InterPro:IPR000608); BEST Arabidopsis thaliana protein match is: ubiquitin E2 variant 1D-4 (TAIR:AT3G52560.1); Has 2912 Blast hits to 2912 proteins in 287 species: Archae - 0; Bacteria - 0; Metazoa - 1566; Fungi - 354; Plants - 579; Viruses - 0; Ot…		5.104	5.457	5.849	7.984	4.51	8.021	7.399	7.124	6.205	8.313	8.159	7.683	7.074	7.155	6.205	11.661	11.532	10.533	14.582	11.57	11.673	8.06	181.853		PtpAffx.24155.1.A1_s_at	13.3293	13.165	12.7178	12.9948
6	Potri.006G207800		LG_6	22304609	22308462		5.7	mBTh3yOR			FAMILY NOT NAMED				AT3G11590.1				unknown protein; LOCATED IN: plasma membrane; EXPRESSED IN: 22 plant structures; EXPRESSED DURING: 13 growth stages; BEST Arabidopsis thaliana protein match is: unknown protein (TAIR:AT5G22310.1); Has 22320 Blast hits to 15179 proteins in 1213 species: Archae - 372; Bacteria - 2307; Metazoa - 10906; Fungi - 1700; Plants - 1146; Viruses - 65; Other Eukaryotes - 5824 (source: NCBI BLink).		2.323	2.61	3.27	3.508	1.992	1.568	2.229	0.738	2.785	2.307	3.237	2.575	4.283	4.349	3.79	2.843	3.123	2.27	1.912	2.842	3.566	1.753	59.873		PtpAffx.102425.1.A1_at	9.21681	9.13649	9.34544	9.08286
6	Potri.006G208600		LG_6	22385216	22388625		5.7	mBTh3yOR		Dcp1-like decapping family	TRANSCRIPTION FACTOR SMIF (DECAPPING ENZYME DCP1)	Decapping enzyme complex component DCP1			AT1G08370.1	ATDCP1,DCP1	decapping 1	Encodes DCP1 involved in mRNA decapping. DCP1 forms a mRNA decapping complex with DCP2 (At5g13570) and VCS (VARICOSE) (At3g13300). However, unlike DCP2, DCP1 itself does not have mRNA decapping activity in vitro. DCP1, DCP2 and VCS colocalize in cytoplasmic loci, which are putative Arabidopsis mRNA processing bodies. mutants of DCP1, DCP2, and VCS accumulate capped mRNAs with a reduced degradatio…	decapping 1 (DCP1); CONTAINS InterPro DOMAIN/s: Dcp1-like decapping (InterPro:IPR010334); Has 3561 Blast hits to 2917 proteins in 377 species: Archae - 4; Bacteria - 239; Metazoa - 1310; Fungi - 561; Plants - 741; Viruses - 142; Other Eukaryotes - 564 (source: NCBI BLink).		2.797	3.244	3.929	2.695	1.351	3.459	3.515	2.761	3.546	1.857	1.782	1.718	2.847	3.026	1.742	3.903	3.918	2.443	3.913	2.783	3.079	2.083	62.391		PtpAffx.115188.1.A1_at	10.98	10.9536	10.8843	10.7322
6	Potri.006G209100		LG_6	22429546	22434199		5.7	mBTh3yOR		Vacuolar protein sorting 55	LEPTIN RECEPTOR-RELATED	Leptin receptor gene-related protein			AT3G11530.2		Vacuolar protein sorting 55 (VPS55) family protein		Vacuolar protein sorting 55 (VPS55) family protein; FUNCTIONS IN: transporter activity; INVOLVED IN: transport; LOCATED IN: vacuole; EXPRESSED IN: 24 plant structures; EXPRESSED DURING: 15 growth stages; CONTAINS InterPro DOMAIN/s: Vacuolar protein sorting 55 (InterPro:IPR007262); BEST Arabidopsis thaliana protein match is: Vacuolar protein sorting 55 (VPS55) family protein (TAIR:AT1G32410.5); Ha…		1.323	1.446	1.645	2.199	0.937	2.226	1.848	1.806	2.649	2.642	2.677	2.496	2.226	2.22	1.859	2.931	3.149	2.515	3.65	3.691	3.872	2.217	52.224		PtpAffx.153619.1.A1_at	9.88894	9.10392	8.06582	8.88636
6	Potri.006G209700		LG_6	22462842	22465683		5.7	mBTh3yOR		Ribosomal protein S4/S9 N-terminal domain	30S 40S RIBOSOMAL PROTEIN	Ribosomal protein S4		small subunit ribosomal protein S9e	AT5G39850.1		Ribosomal protein S4		Ribosomal protein S4; FUNCTIONS IN: structural constituent of ribosome; INVOLVED IN: translation; LOCATED IN: cytosolic small ribosomal subunit, membrane; EXPRESSED IN: 22 plant structures; EXPRESSED DURING: 13 growth stages; CONTAINS InterPro DOMAIN/s: Ribosomal protein S4 (InterPro:IPR001912), Ribosomal protein S4, conserved site (InterPro:IPR018079), Ribosomal protein S4/S9, eukaryotic/archaea…		22.654	16.981	34.448	31.918	29.93	21.043	3.663	9.223	28.029	19.104	36.561	28.688	25.652	27.464	22.866	28.211	28.564	28.071	38.463	25.815	24.417	23.708	555.473		PtpAffx.249.44.S1_x_at	13.0038	12.9783	12.7828	12.691
6	Potri.006G210500		LG_6	22494636	22498469		5.7	mBTh3yOR			FAMILY NOT NAMED				AT5G06130.1		chaperone protein dnaJ-related		chaperone protein dnaJ-related; BEST Arabidopsis thaliana protein match is: unknown protein (TAIR:AT5G61670.2); Has 35333 Blast hits to 34131 proteins in 2444 species: Archae - 798; Bacteria - 22429; Metazoa - 974; Fungi - 991; Plants - 531; Viruses - 0; Other Eukaryotes - 9610 (source: NCBI BLink).		7.081	6.721	6.982	8.026	12.844	4.502	5.247	4.666	6.333	10.237	7.508	9.632	5.118	5.632	8.488	4.988	5.041	9.926	4.624	11.51	9.405	9.833	164.344		PtpAffx.158450.1.S1_at	10.8228	10.5353	9.9976	10.4976
6	Potri.006G211100		LG_6	22546185	22548377		5.7	mBTh3yOR		LSM domain	SMALL NUCLEAR RIBONUCLEOPROTEIN	Small Nuclear ribonucleoprotein G		small nuclear ribonucleoprotein G	AT3G11500.1		Small nuclear ribonucleoprotein family protein		Small nuclear ribonucleoprotein family protein; FUNCTIONS IN: molecular_function unknown; LOCATED IN: nucleolus, nucleus, small nucleolar ribonucleoprotein complex; EXPRESSED IN: 22 plant structures; EXPRESSED DURING: 13 growth stages; CONTAINS InterPro DOMAIN/s: Like-Sm ribonucleoprotein (LSM) domain (InterPro:IPR001163), Like-Sm ribonucleoprotein (LSM) domain, eukaryotic/archaea-type (InterPro:…		8.622	8.629	8.14	12.032	8.209	4.898	7.72	2.76	20.234	4.325	10.081	7.044	8.468	8.033	6.157	5.887	4.891	4.673	8.372	7.324	7.629	5.578	169.706		PtpAffx.14782.1.A1_s_at	10.2294	9.44532	8.88866	8.84665
6	Potri.006G211900		LG_6	22598751	22600623		5.7	mBTh3yOR		Replication factor A protein 3	FAMILY NOT NAMED			replication factor A3	AT3G52630.1		Nucleic acid-binding, OB-fold-like protein		Nucleic acid-binding, OB-fold-like protein; CONTAINS InterPro DOMAIN/s: Nucleic acid-binding, OB-fold-like (InterPro:IPR016027), Replication factor A protein 3 (InterPro:IPR013970); BEST Arabidopsis thaliana protein match is: Nucleic acid-binding, OB-fold-like protein (TAIR:AT4G18590.1); Has 94 Blast hits to 94 proteins in 37 species: Archae - 0; Bacteria - 0; Metazoa - 29; Fungi - 0; Plants - 56…		5.04	3.889	3.689	5.667	7.951	1.33	2.589	1.1	3.131	3.498	9.731	6.7	5.392	4.332	5.756	4.469	3.817	3.851	5.35	4.674	5.877	3.047	100.88		PtpAffx.17813.1.S1_at	9.36624	10.0899	9.47336	9.26929
18	Potri.018G016800		LG_18	1316790	1320869		4.52	mBTh3yOR		Protein of unknown function (DUF1077)	FAMILY NOT NAMED	Predicted membrane protein			AT5G10780.1				CONTAINS InterPro DOMAIN/s: Uncharacterised conserved protein UCP017207, transmembrane protein 85 (InterPro:IPR016687), Protein of unknown function DUF1077 (InterPro:IPR009445); Has 30201 Blast hits to 17322 proteins in 780 species: Archae - 12; Bacteria - 1396; Metazoa - 17338; Fungi - 3422; Plants - 5037; Viruses - 0; Other Eukaryotes - 2996 (source: NCBI BLink).		9.346	9.399	8.898	8.593	5.907	13.529	13.783	10.822	10.951	9.097	10.562	10.182	7.195	7.312	8.342	11.6	11.331	11.613	14.705	10.18	9.796	8.011	221.154		PtpAffx.2885.1.S1_at	10.8074	10.4966	10.0515	10.7216
18	Potri.018G017200		LG_18	1336956	1342658		4.52	mBTh3yOR		cwf21 domain	RNA PROCESSING PROTEIN LD23810P				AT5G25060.1		RNA recognition motif (RRM)-containing protein		RNA recognition motif (RRM)-containing protein; FUNCTIONS IN: RNA binding, nucleotide binding, nucleic acid binding; INVOLVED IN: RNA processing; EXPRESSED IN: 23 plant structures; EXPRESSED DURING: 13 growth stages; CONTAINS InterPro DOMAIN/s: RNA polymerase II, large subunit, CTD (InterPro:IPR006569), mRNA splicing factor, Cwf21 (InterPro:IPR013170), ENTH/VHS (InterPro:IPR008942), SWAP/Surp (In…		1.573	1.51	1.729	1.77	1.458	1.504	1.618	2.765	4.25	1.107	1.316	1.098	2.053	1.934	1.696	1.699	1.704	1.775	1.39	1.329	1.56	1.475	38.313		PtpAffx.63920.1.S1_at	9.20109	8.73414	8.72427	8.74971
18	Potri.018G017200		LG_18	1336956	1342658		4.52	mBTh3yOR		cwf21 domain	RNA PROCESSING PROTEIN LD23810P				AT5G25060.1		RNA recognition motif (RRM)-containing protein		RNA recognition motif (RRM)-containing protein; FUNCTIONS IN: RNA binding, nucleotide binding, nucleic acid binding; INVOLVED IN: RNA processing; EXPRESSED IN: 23 plant structures; EXPRESSED DURING: 13 growth stages; CONTAINS InterPro DOMAIN/s: RNA polymerase II, large subunit, CTD (InterPro:IPR006569), mRNA splicing factor, Cwf21 (InterPro:IPR013170), ENTH/VHS (InterPro:IPR008942), SWAP/Surp (In…		1.573	1.51	1.729	1.77	1.458	1.504	1.618	2.765	4.25	1.107	1.316	1.098	2.053	1.934	1.696	1.699	1.704	1.775	1.39	1.329	1.56	1.475	38.313		PtpAffx.63920.1.S1_at	9.20109	8.73414	8.72427	8.74971
18	Potri.018G018200		LG_18	1393715	1394619		4.52	mBTh3yOR		Plastocyanin-like domain					AT2G25060.1	AtENODL14,ENODL14	early nodulin-like protein 14		early nodulin-like protein 14 (ENODL14); FUNCTIONS IN: electron carrier activity, copper ion binding; LOCATED IN: anchored to plasma membrane, plasma membrane, anchored to membrane; EXPRESSED IN: 20 plant structures; EXPRESSED DURING: 13 growth stages; CONTAINS InterPro DOMAIN/s: Plastocyanin-like (InterPro:IPR003245), Cupredoxin (InterPro:IPR008972); BEST Arabidopsis thaliana protein match is: e…		51.476	26.795	37.255	29.086	152.056	14.315	25.473	2.975	0.712	113.576	157.283	166.186	14.058	12.604	128.356	35.823	50.107	31.491	43.448	75.882	60.343	63.682	1292.98		PtpAffx.214245.1.S1_a_at	10.4955	11.0366	10.7105	10.3733
18	Potri.018G018400		LG_18	1397404	1401230		4.52	mBTh3yOR		Endomembrane protein 70	TRANSMEMBRANE 9 SUPERFAMILY PROTEIN				AT5G10840.1		Endomembrane protein 70 protein family		Endomembrane protein 70 protein family; LOCATED IN: integral to membrane, Golgi apparatus, plasma membrane, plant-type cell wall; EXPRESSED IN: 23 plant structures; EXPRESSED DURING: 13 growth stages; CONTAINS InterPro DOMAIN/s: Nonaspanin (TM9SF) (InterPro:IPR004240); BEST Arabidopsis thaliana protein match is: Endomembrane protein 70 protein family (TAIR:AT5G25100.1); Has 1652 Blast hits to 162…		95.005	67.906	62.877	38.376	36.632	100.248	100.112	49.76	18.001	55.043	44.221	55.415	50.192	46.166	55.878	52.048	56.537	84.677	63.957	64.25	49.742	40.898	1287.94		PtpAffx.21035.2.S1_at	12.62	12.9353	13.2702	13.7829
18	Potri.018G014800		LG_18	1193775	1196907		3.89	mBTh3yOR		Xylanase inhibitor C-terminal	ASPARTYL PROTEASES	Aspartyl protease	Nepenthesin.		AT5G10770.1		Eukaryotic aspartyl protease family protein		Eukaryotic aspartyl protease family protein; FUNCTIONS IN: DNA binding, aspartic-type endopeptidase activity; INVOLVED IN: proteolysis; EXPRESSED IN: 12 plant structures; EXPRESSED DURING: 4 anthesis, C globular stage, petal differentiation and expansion stage, E expanded cotyledon stage; CONTAINS InterPro DOMAIN/s: Peptidase aspartic (InterPro:IPR021109), Peptidase aspartic, catalytic (InterPro:…		30.126	19.063	12.03	4.045	34.32	11.117	13.03	10.076	0.471	94.454	159.54	173.3	11.558	9.535	156.293	75.133	102.261	1.484	15.352	101.565	56.899	34.806	1126.46		PtpAffx.39752.1.A1_s_at	13.5421	14.2549	14.1031	12.3575
18	Potri.018G015100		LG_18	1218543	1223012		3.89	mBTh3yOR		Xylanase inhibitor C-terminal	ASPARTYL PROTEASES	Aspartyl protease	Nepenthesin.		AT5G10770.1		Eukaryotic aspartyl protease family protein		Eukaryotic aspartyl protease family protein; FUNCTIONS IN: DNA binding, aspartic-type endopeptidase activity; INVOLVED IN: proteolysis; EXPRESSED IN: 12 plant structures; EXPRESSED DURING: 4 anthesis, C globular stage, petal differentiation and expansion stage, E expanded cotyledon stage; CONTAINS InterPro DOMAIN/s: Peptidase aspartic (InterPro:IPR021109), Peptidase aspartic, catalytic (InterPro:…		19.329	20.671	21.398	10.832	30.715	19.521	11.918	212.554	54.689	45.541	11.08	17.365	17.127	16.541	13.651	74.94	107.499	179.935	89.452	229.254	152.218	51.167	1407.4		PtpAffx.653.8.S1_s_at	12.7223	11.9586	12.5208	12.9029
18	Potri.018G018400		LG_18	1397404	1401230		4.52	mBTh3yOR		Endomembrane protein 70	TRANSMEMBRANE 9 SUPERFAMILY PROTEIN				AT5G10840.1		Endomembrane protein 70 protein family		Endomembrane protein 70 protein family; LOCATED IN: integral to membrane, Golgi apparatus, plasma membrane, plant-type cell wall; EXPRESSED IN: 23 plant structures; EXPRESSED DURING: 13 growth stages; CONTAINS InterPro DOMAIN/s: Nonaspanin (TM9SF) (InterPro:IPR004240); BEST Arabidopsis thaliana protein match is: Endomembrane protein 70 protein family (TAIR:AT5G25100.1); Has 1652 Blast hits to 162…		95.005	67.906	62.877	38.376	36.632	100.248	100.112	49.76	18.001	55.043	44.221	55.415	50.192	46.166	55.878	52.048	56.537	84.677	63.957	64.25	49.742	40.898	1287.94		PtpAffx.21035.2.S1_at	12.62	12.9353	13.2702	13.7829
[truncated: 2 more columns]
